# Supplementary material for: Differential Regulation of Hepatic Macrophage Fate by Chi3l1 in MASLD
Source: eLife journal article supplement (doi:10.7554/elife.107023), 2025-06-26
Supplement: fig1-data2 [file elife-107023-fig1-data2-v1.pdf]

# Raw unedited membranes

**Figure 1C**

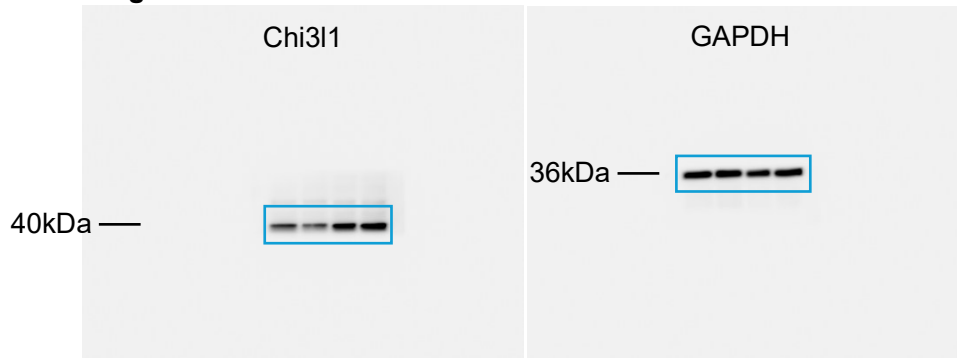

**Figure 1D**

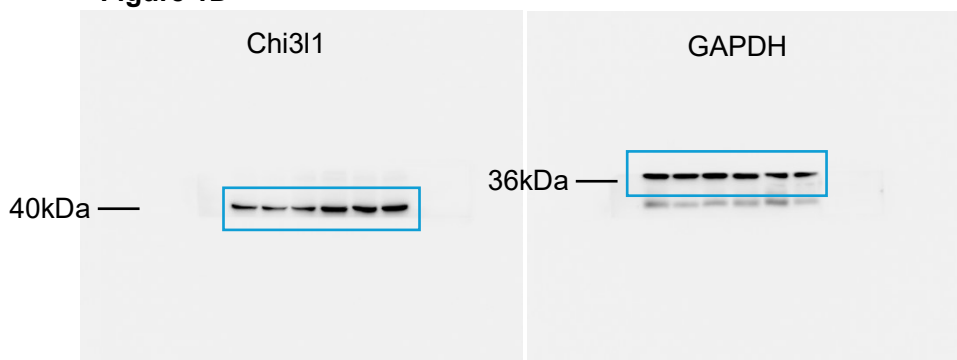

Figure 1-Source Data 2. Original membranes corresponding to Figure 1C and 1D. Chi3l1 in isolated Kupffer cells (KCs, Figure 1C) from mice fed either NCD or HFHC diet; The lower membranes show whole liver tissue (Liver, Figure 1D) from mice fed either NCD (first three lanes) or HFHC (lanes 4, 5, and 6) diet.
