# Supplementary material for: Differential Regulation of Hepatic Macrophage Fate by Chi3l1 in MASLD
Source: eLife journal article supplement (doi:10.7554/elife.107023), 2025-06-26
Supplement: fig1-figsupp1-data2 [file elife-107023-fig1-figsupp1-data2-v1.pdf]

# Raw unedited membranes

Figure 1-Figure supplement 1B

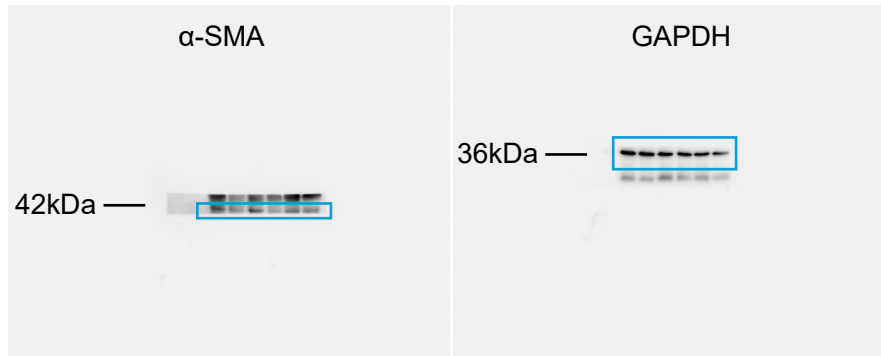

Figure 1-Figure supplement 1-Source Data 5. Original membranes corresponding to Figure 1-Figure supplement 1B.  $\alpha$ -SMA expression in whole liver lysates from NCD-and HFHC-fed mice.
