# Supplementary material for: Differential Regulation of Hepatic Macrophage Fate by Chi3l1 in MASLD
Source: eLife journal article supplement (doi:10.7554/elife.107023), 2025-06-26
Supplement: fig2-figsupp1-data2 [file elife-107023-fig2-figsupp1-data2-v1.pdf]

# Raw unedited membranes

Figure 2-Figure supplement 1C

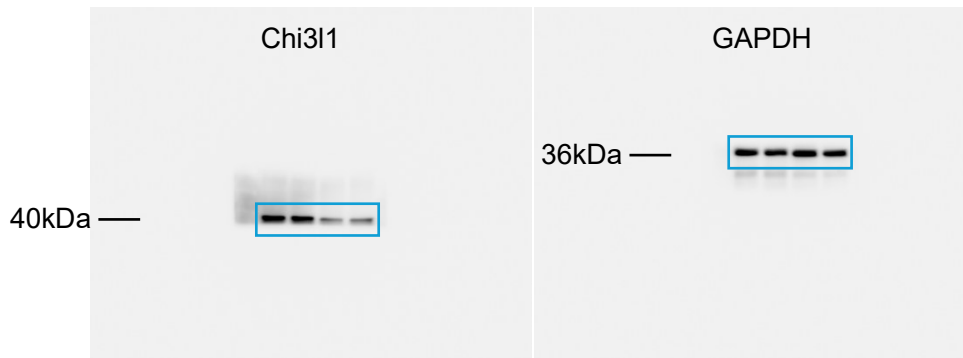

Figure 2-Figure supplement 1-Source Data 3. Original membranes corresponding to Figure 2-Figure supplement 1C. Chi3l1 expression in isolated KCs of Chi3l1<sup>fl/fl</sup> (first two lanes) and Chi3l1-KpKO (lanes 3 and 4) mice.
