# Supplementary material for: Differential Regulation of Hepatic Macrophage Fate by Chi3l1 in MASLD
Source: eLife journal article supplement (doi:10.7554/elife.107023), 2025-06-26
Supplement: fig3-data2 [file elife-107023-fig3-data2-v1.pdf]

# Raw unedited membranes

**Figure 3B**

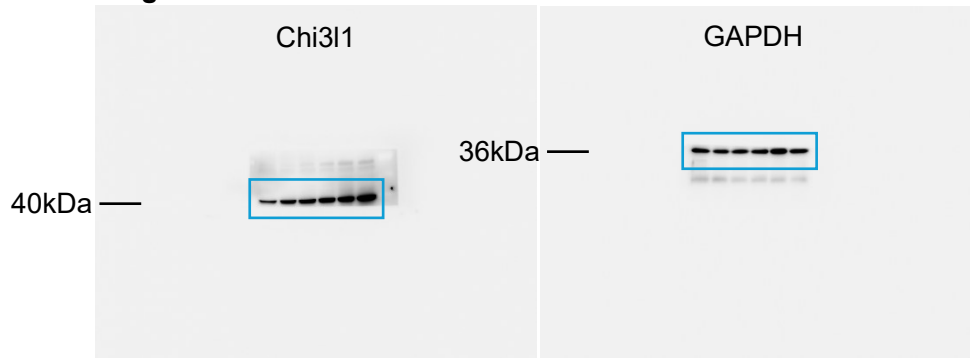

Figure 3-Source Data 2. Original membranes corresponding to Figure 3B. Chi3l1 expression in whole liver tissues under NCD (first three lanes) and MCD (lanes 4, 5, and 6) diets.
