# Supplementary material for: Differential Regulation of Hepatic Macrophage Fate by Chi3l1 in MASLD
Source: eLife journal article supplement (doi:10.7554/elife.107023), 2025-06-26
Supplement: fig3-figsupp1-data2 [file elife-107023-fig3-figsupp1-data2-v1.pdf]

# Raw unedited membranes

**Figure 3-Figure supplement 1C-BMDM**

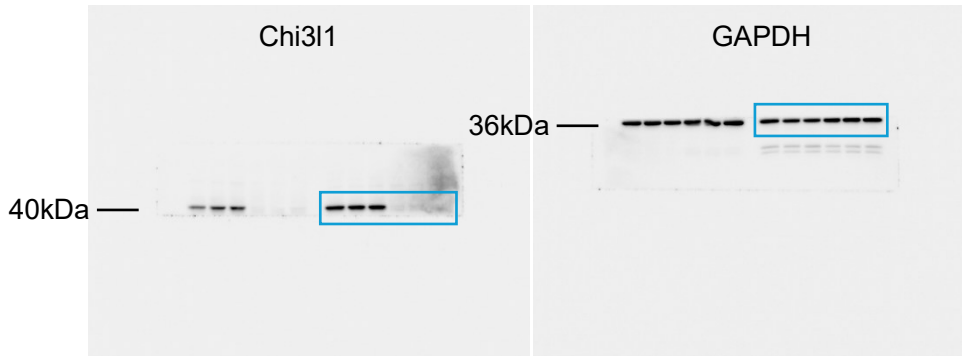

**Figure 3-Figure supplement 1C -KCs**

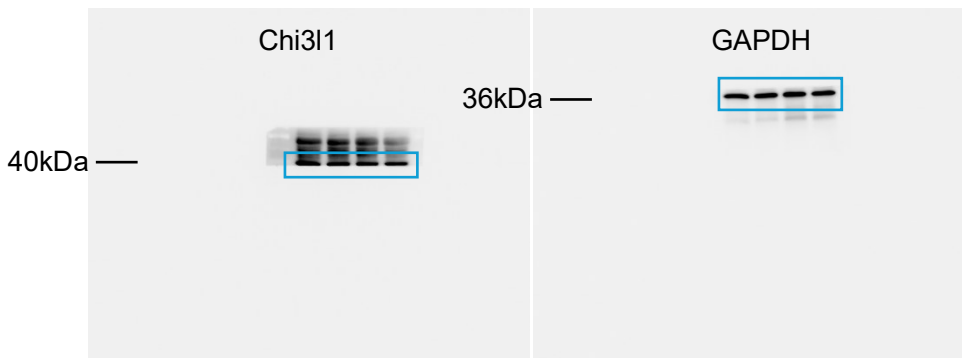

Figure 3-Figure supplement 1-Source Data 5. Original membranes corresponding to Figure 3-Figure supplement 1C. Chi3l1 in BMDM (Figure 1C) from Chi3l1<sup>fl/fl</sup> and Chi3l1-MKO mice. The lower membranes show primary KCs (Figure 1C) from Chi3l1<sup>fl/fl</sup> and Chi3l1-MKO mice.
