# Supplementary material for: Differential regulation of hepatic macrophage fate by Chi3l1 in metabolic dysfunction-associated steatotic liver disease
Source: eLife. 2026 Jun 26;14:RP107023. doi: 10.7554/eLife.107023 (PMC13309125; doi:10.7554/eLife.107023)
Supplement: Figure 1—figure supplement 1—source data 1. [file elife-107023-fig1-figsupp1-data1.xlsx]

## Sheet: Figure S1A
Group	Sirius red+ area/(%)	Sirius red+ area/(%) Average		t` test	P value	P value summary	Significantly different (P < 0.05)?
WT NCD M1	0.397016	0.587293		WT NCD VS WT HFHC	0.889	ns	No
	0.33239
	0.70808
	0.662196
	1.17432
	0.505084
	0.508028
	0.411233
WT NCD M2	0.54192	0.640596
	0.959257
	0.780891
	0.281552
	0.639361
WT NCD M3	0.430118	0.575094
	0.320255
	0.320542
	0.61825
	0.75102
	0.836469
	0.749006
WT NCD M4	0.402617	0.491687
	0.807316
	0.535171
	0.599652
	0.424876
	0.330882
	0.341294
WT HFHC M1	0.385958	0.410958
	0.404125
	0.284352
	0.287009
	0.559297
	0.545008
WT HFHC M2	0.477367	0.627556
	0.717127
	0.887667
	0.618968
	0.436653
WT HFHC M3	0.34352	0.644208
	0.698601
	1.03537
	0.499339
WT HFHC M4	0.785846	0.682062
	0.482321
	0.720933
	1.16864
	0.489789
	0.444839
WT HFHC M5	0.315803	0.480869
	0.339858
	0.986544
	0.277387
	0.557359
	0.288373
	0.719353
	0.498621
	0.344526
WT HFHC M6	0.59694	0.545472
	0.557502
	0.389692
	1.00464
	0.631463
	0.27236
	0.365708
