# Supplementary material for: Differential regulation of hepatic macrophage fate by Chi3l1 in metabolic dysfunction-associated steatotic liver disease
Source: eLife. 2026 Jun 26;14:RP107023. doi: 10.7554/eLife.107023 (PMC13309125; doi:10.7554/eLife.107023)
Supplement: Figure 1—figure supplement 2—source data 1. [file elife-107023-fig1-figsupp2-data1.xlsx]

## Sheet: Figure S2B
	Chi3l1	18s	dCt	2^-ddCt	average	normalize			P value	P value summary	Significantly different (P < 0.05)?
WT 0w m1	37.3037	11.0767	26.227	1.27318e-08	3.83818e-08	0.331715		WT VS Chi3l1-/- 0w	0.221159	ns	No
WT 0w m2	35.8625	11.8348	24.0277	5.84711e-08		1.52341		WT VS Chi3l1-/- 8w	0.19886	ns	No
WT 0w m3	37.1506	12.7108	24.4398	4.39425e-08		1.14488		WT VS Chi3l1-/- 16w	0.003655	**	Yes
Chi3l1-/- 0w m1	0	11.8487	0	0		0
Chi3l1-/- 0w m2	36.9632	12.25	24.7133	3.63548e-08		0.947189
Chi3l1-/- 0w m3	0	12.2958	0	0		0
WT 8w m1	33.2824	12.2224	21.06	4.57426e-07		11.9178
WT 8w m2	35.3958	11.852	23.5438	8.17751e-08		2.13057
WT 8w m3	34.7452	12.2939	22.4514	1.74368e-07		4.54298
WT 8w m4	32.2685	11.9979	20.2706	7.90599e-07		20.5983
Chi3l1-/- 8w m1	0	12.8169	0	0		0
Chi3l1-/- 8w m2	35.6262	11.8952	23.731	7.1821e-08		1.87123
Chi3l1-/- 8w m3	34.5441	12.2324	22.3117	1.92092e-07		5.00477
WT 16w m1	30.0338	11.4113	18.6225	2.47778e-06		64.5561
WT 16w m2	30.9584	11.5102	19.4483	1.39795e-06		36.4221
WT 16w m3	31.239	12.3282	18.9109	2.0289e-06		52.8611
Chi3l1-/- 16w m1	32.9701	9.13133	23.8387	6.66536e-08		1.73659
Chi3l1-/- 16w m2	33.3897	9.7618	23.6279	7.71417e-08		2.00985
Chi3l1-/- 16w m3	32.7149	7.22096	25.4939	2.11628e-08		0.551375
