# Supplementary material for: Differential regulation of hepatic macrophage fate by Chi3l1 in metabolic dysfunction-associated steatotic liver disease
Source: eLife. 2026 Jun 26;14:RP107023. doi: 10.7554/eLife.107023 (PMC13309125; doi:10.7554/eLife.107023)
Supplement: Figure 1—source data 1. [file elife-107023-fig1-data1.xlsx]

## Sheet: Figure 1A
Group	Chi3l1+F4/80+ cells	F4/80+ cells	Chi3l1+F4/80+ cells/F4/80+ cells	Average		t` test	P value	P value summary	Significantly different (P < 0.05)?
WT NCD M1	4	31	12.9032	9.975		NCD VS HFHC	0.028	*	Yes
	3	23	13.0435
	2	15	13.3333
	1	24	4.16667
	3	30	10
	3	26	11.5385
	0	24	0
	4	27	14.8148
WT NCD M2	1	27	3.7037	5.80375
	2	22	9.09091
	1	19	5.26316
	1	20	5
	2	17	11.7647
	0	23	0
WT NCD M3	2	13	15.3846	9.49592
	2	15	13.3333
	2	22	9.09091
	3	24	12.5
	2	30	6.66667
	0	21	0
WT NCD M4	1	14	7.14286	6.05655
	1	16	6.25
	1	15	6.66667
	1	24	4.16667
WT HFHC M1	3	13	23.0769	21.1902
	3	9	33.3333
	3	25	12
	4	24	16.6667
	5	18	27.7778
	3	20	15
	3	12	25
	3	18	16.6667
WT HFHC M2	2	11	18.1818	13.6621
	3	16	18.75
	3	19	15.7895
	1	18	5.55556
	2	23	8.69565
	3	20	15
WT HFHC M3	3	20	15	11.515
	3	19	15.7895
	2	16	12.5
	2	14	14.2857
	0	16	0
WT HFHC M4	3	16	18.75	12.9454
	2	13	15.3846
	3	17	17.6471
	0	18	0

## Sheet: Figure 1E
GSE167523			GSE207310				GSE130970			GSE167523	Mann-Whitney test	P value	P value summary	Significantly different (P < 0.05)?
MAFL	MASH		No MASLD	MAFL	MASH		No MASH	MASH			MAFL VS MASH	<0.001	***	Yes
133	1035		34	769	671		761.837	928.15
12	79		24	1292	1326		474.953	2335.24		GSE207310	Mann-Whitney test	P value	P value summary	Significantly different (P < 0.05)?
282	1610		197	34	790		70.7696	322.824			No MASLD VS MAFL	0.395	ns	No
113	577		131	56	778		30.6146	419.445			No MASLD VS MASH	0.008	**	Yes
177	2421		146	2046	930		497.073	1760.68			MAFL VS MASH	0.023	*	Yes
390	703			181	1408		548.146	569.509
144	1249			138	1704		68.2262	948.021		GSE130970	Mann-Whitney test	P value	P value summary	Significantly different (P < 0.05)?
172	1012			628	996		203.639	735.174			No MASH VS MASH	0.001	**	Yes
55	770			112	30		120.42	906.582
167	889			95	208		65.9103	177.724
298	1294			33			341.88	571.534
25	601			249			332.337	675.338
155	379			217			69.2055	532.452
567	382			84			54.7604	938.949
74	349			1			61.1355	495.615
79	824						245.049	1812.56
839	766						379.779	1048.34
232	726						659.111	1402.95
6	257						435.795	120.664
1215	540						233.994	585.899
16	664							166.931
271	390							620.246
226	529							583.791
70	289							53.824
78	1744							183.088
21	1099							1462.35
22	94							459.159
134	1456							923.153
610	135							3028.64
75	1238							1554.81
211	289							386.13
307	660							680.472
62	217							1965.15
248	224							443.317
14	236							595.56
998	1930							1009.19
62	342							215.442
134	967							380.16
130	741							202.731
264	113							749.974
16	171							1506.43
52	125							155.688
28	162							201.243
86	631							516.378
140	1576							201.599
83	717							742.752
72	1277							693.446
69								68.6048
1018								42.567
545								77.108
43								334.565
								243.26
								147.159
								748.686
								912.651
								422.939
								1253.97
								225.603

## Sheet: Figure 1F
GSE130970			GSE130970			GSE130970	Linear Regression Analysis	R	P value	P value summary	Significantly different (P < 0.05)?
NAFLD activity score	Chil1		Fibrosis stage	Chil1			NAFLD activity score	0.3108	0.0056	**	Yes
0	70.7696		0	68.2262
0	30.6146		0	203.639		GSE130970	Linear Regression Analysis	R	P value	P value summary	Significantly different (P < 0.05)?
0	497.073		0	120.42			Fibrosis stage	0.5164	<0.0001	***	Yes
0	548.146		0	443.317
1	120.42		0	65.9103
1	435.795		0	341.88
1	42.567		0	332.337
1	761.837		0	69.2055
1	474.953		0	595.56
2	53.824		0	54.7604
2	183.088		0	61.1355
2	332.337		0	1009.19
2	69.2055		0	215.442
2	61.1355		0	380.16
2	379.779		0	245.049
2	659.111		0	379.779
2	233.994		0	659.111
2	742.752		0	435.795
3	1812.56		0	233.994
3	585.899		0	761.837
3	166.931		0	474.953
3	620.246		0	70.7696
3	583.791		0	30.6146
3	923.153		0	497.073
3	3028.64		0	548.146
3	68.2262		1	532.452
3	203.639		1	1402.95
3	680.472		1	120.664
3	65.9103		1	166.931
3	341.88		1	583.791
3	54.7604		1	183.088
3	245.049		1	386.13
3	201.243		1	680.472
3	201.599		1	1965.15
3	147.159		1	202.731
3	225.603		1	749.974
4	2335.24		1	1506.43
4	906.582		1	155.688
4	177.724		1	201.243
4	571.534		1	516.378
4	1048.34		1	201.599
4	120.664		1	742.752
4	459.159		1	693.446
4	443.317		1	68.6048
4	595.56		1	42.567
4	1009.19		1	77.108
4	215.442		1	334.565
4	202.731		1	243.26
4	749.974		1	147.159
4	1506.43		1	748.686
4	516.378		1	422.939
4	243.26		1	1253.97
5	928.15		1	225.603
5	322.824		2	675.338
5	419.445		2	938.949
5	948.021		2	495.615
5	675.338		2	1812.56
5	532.452		2	1048.34
5	938.949		2	585.899
5	495.615		2	620.246
5	1402.95		2	53.824
5	1462.35		2	1462.35
5	1554.81		3	928.15
5	386.13		3	2335.24
5	380.16		3	322.824
5	155.688		3	419.445
5	693.446		3	1760.68
5	68.6048		3	569.509
5	77.108		3	948.021
5	1253.97		3	735.174
6	1760.68		3	906.582
6	569.509		3	177.724
6	735.174		3	571.534
6	1965.15		3	459.159
6	334.565		3	923.153
6	748.686		3	912.651
6	912.651		4	3028.64
6	422.939		4	1554.81
