# Supplementary material for: Differential regulation of hepatic macrophage fate by Chi3l1 in metabolic dysfunction-associated steatotic liver disease
Source: eLife. 2026 Jun 26;14:RP107023. doi: 10.7554/eLife.107023 (PMC13309125; doi:10.7554/eLife.107023)
Supplement: Figure 2—figure supplement 1—source data 1. [file elife-107023-fig2-figsupp1-data1.xlsx]

## Sheet: Figure S1B
Chi3l1 mRNA expression of KCs									t` test	P value	P value summary	Significantly different (P < 0.05)?
Group	Chi3l1	18s	dCt	2^-ddCt	Average	Normalize	Normalize Average		Chi3l1fl/fl VS Chi3l1-KpKO 0W	0.005288	**	Yes
Chi3l1fl/fl 0w m1	28.4708	11.3782	17.0926	7.15532e-06	6.00152e-06	1.19225	1.32204		Chi3l1fl/fl VS Chi3l1-KpKO 4W	0.014029	*	Yes
	27.8823	11.0739	16.8084	8.71322e-06		1.45184
Chi3l1fl/fl 0w m2	28.8817	11.8754	17.0063	7.59619e-06		1.26571	0.845921
	29.5727	10.9958	18.5769	2.55743e-06		0.426131
Chi3l1fl/fl 0w m3	29.8468	11.7034	18.1434	3.45379e-06		0.575485	0.832036
	29.1916	11.9679	17.2238	6.53317e-06		1.08859
Chi3l1-KpKO 0w m1	32.0999	11.5863	20.5136	6.68013e-07		0.111307	0.137462
	32.13	12.1721	19.9578	9.81955e-07		0.163618
Chi3l1-KpKO 0w m2	31.6622	11.9594	19.7028	1.17183e-06		0.195255	0.114932
	33.3798	11.1808	22.199	2.07704e-07		0.0346085
Chi3l1-KpKO 0w m3	34.1655	11.7307	22.4347	1.76392e-07		0.0293912	0.0296108
	34.4763	12.063	22.4133	1.79028e-07		0.0298304
Chi3l1fl/fl 4w m1	27.925	11.3137	16.6113	9.9883e-06		1.6643	1.47039
	27.8966	10.9026	16.9941	7.66088e-06		1.27649
Chi3l1fl/fl 4w m2	28.8486	11.0028	17.8458	4.24501e-06		0.707322	0.772515
	28.6396	11.0379	17.6017	5.02752e-06		0.837708
Chi3l1fl/fl 4w m3	28.7491	11.3587	17.3905	5.82031e-06		0.969806	0.840844
	29.057	11.2204	17.8365	4.27237e-06		0.711882
Chi3l1-KpKO 4w m1	31.5001	11.3526	20.1475	8.60998e-07		0.143463	0.112133
	32.5649	11.5892	20.9757	4.84935e-07		0.0808021
Chi3l1-KpKO 4w m2	31.8643	10.5695	21.2948	3.88713e-07		0.0647691	0.049315
	33.1439	10.9134	22.2305	2.03217e-07		0.0338609
Chi3l1-KpKO 4w m3	32.8592	11.3665	21.4927	3.38888e-07		0.0564671	0.127484
	31.8047	12.1257	19.679	1.19131e-06		0.198502
Chi3l1 mRNA expression of MoMFs									t` test	P value	P value summary	Significantly different (P < 0.05)?
Group	Chi3l1	18s	dCt	2^-ddCt	Average	Normalize	Normalize Average		Chi3l1fl/fl VS Chi3l1-KpKO 0W	0.555254	ns	No
Chi3l1fl/fl 0w m1	28.9405	11.7691	17.1714	6.77461e-06	4.42375e-06	1.53142	1.24558		Chi3l1fl/fl VS Chi3l1-KpKO 4W	0.984103	ns	No
	28.6137	10.7681	17.8456	4.2457e-06		0.959751
Chi3l1fl/fl 0w m2	28.6345	10.8368	17.7977	4.38903e-06		0.992151	0.918042
	28.4976	10.4665	18.0311	3.73335e-06		0.843932
Chi3l1fl/fl 0w m3	28.9229	10.9599	17.963	3.91382e-06		0.884729	0.836375
	29.0358	10.9058	18.13	3.48601e-06		0.78802
Chi3l1-KpKO 0w m1	28.6468	11.0756	17.5711	5.1352e-06		1.16083	0.982318
	28.8872	10.7859	18.1014	3.55586e-06		0.803811
Chi3l1-KpKO 0w m2	28.8436	10.7691	18.0745	3.62278e-06		0.818938	1.09959
	28.6294	11.308	17.3214	6.10585e-06		1.38024
Chi3l1-KpKO 0w m3	28.8193	11.0919	17.7274	4.60805e-06		1.04166	1.18444
	29.0302	11.6523	17.3779	5.87128e-06		1.32722
Chi3l1fl/fl 4w m1	28.7835	12.1816	16.6019	1.00537e-05		2.27266	1.69897
	29.3692	11.7532	17.616	4.97798e-06		1.12529
Chi3l1fl/fl 4w m2	28.5877	11.6185	16.9692	7.79427e-06		1.76191	1.6335
	28.8085	11.612	17.1964	6.65816e-06		1.50509
Chi3l1fl/fl 4w m3	28.9037	11.8655	17.0383	7.42968e-06		1.6795	1.4296
	29.0766	11.5288	17.5479	5.21873e-06		1.17971
Chi3l1-KpKO 4w m1	29.8908	12.017	17.8738	4.16335e-06		0.941135	1.04129
	29.5009	11.9055	17.5954	5.04951e-06		1.14145
Chi3l1-KpKO 4w m2	28.9945	11.7427	17.2518	6.40761e-06		1.44846	1.38431
	28.7414	11.3559	17.3856	5.84007e-06		1.32016
Chi3l1-KpKO 4w m3	28.9929	12.251	16.7419	9.12388e-06		2.06248	2.3118
	28.6323	12.2027	16.4295	1.13298e-05		2.56112
