# Supplementary material for: Differential regulation of hepatic macrophage fate by Chi3l1 in metabolic dysfunction-associated steatotic liver disease
Source: eLife. 2026 Jun 26;14:RP107023. doi: 10.7554/eLife.107023 (PMC13309125; doi:10.7554/eLife.107023)
Supplement: Figure 2—figure supplement 2—source data 1. [file elife-107023-fig2-figsupp2-data1.xlsx]

## Sheet: Figure S2A
Weight(g)											t` test	P value	P value summary	Significantly different (P < 0.05)?
	Clec4f cre						Chi3l1-KpKO				Clec4f cre VS Chi3l1-KpKO HFHC 16w	0.001	**	Yes
Weeks	M1	M2	M3	M4	M5	M6	M1	M2	M3
0w	19.23	20.76	20.97	21.44	19.72	20.89	23.25	23.24	22.76
1w	20.875	22.79	23.195	23.65	21.43	22.465	25.65	25.925	25.13
2w	22.52	24.82	25.42	25.86	23.14	24.04	28.05	28.61	27.5
3w	23.41	25.93	26.1	27.18	24.08	24.95	29.98	29.97	28.98
4w	23.87	26.74	26.32	27.66	24.73	26.15	31.73	31.43	31.14
5w	24.57	26.93	26.76	28.64	25.25	26.61	32.85	32.76	32.76
6w	26.7	29.33	27.63	31.46	27.55	28.32	34.45	34.14	33.7
7w	27.36	30.66	29.31	32.23	28.18	28.11	35.14	34.96	34.77
8w	27.26	29.86	29.33	33.08	28.74	29.36	35.9	35.3	35.01
9w	27.98	30.69	30.47	32.16	28.92	29.33	36.2	36.23	34.87
10w	28.73	30.9	31.23	32.63	28.38	29.28	38.56	38.35	36.67
11w	29.99	31.34	32.19	34.1	29.12	30.43	37.97	39.06	37.25
12w	30.85	32.26	33.06	34.62	29.75	30.45	38.65	39.84	37.56
13w	32.14	33.64	33.49	35.18	30.87	30.64	40.6	40.93	39.06
14w	32.71	33.69	34.38	35.7	32.23	31.08	42.56	41.97	40.99
15w	34.01	35.76	35.83	36.97	33.05	32.09	43.93	43.46	42.53
16w	34.25	35.41	37.05	38.15	34.58	33.3	43.73	43.44	43.39

## Sheet: Figure S2B
The percentage initial mass											t` test	P value	P value summary	Significantly different (P < 0.05)?
	Clec4f cre						Chi3l1-KpKO				Clec4f cre VS Chi3l1-KpKO HFHC 16w	0.009	**	Yes
Weeks	M1	M2	M3	M4	M5	M6	M1	M2	M3
0w	0	0	0	0	0	0	0	0	0
1w	8.55434	9.7784	10.6104	10.3078	8.6714	7.5395	10.3226	11.5534	10.413
2w	17.1087	19.5568	21.2208	20.6157	17.3428	15.079	20.6452	23.1067	20.826
3w	21.7369	24.9037	24.4635	26.7724	22.1095	19.4351	28.9462	28.9587	27.3286
4w	24.129	14.9807	27.5155	22.7612	40.2637	18.382	36.4731	35.241	36.819
5w	27.7691	29.7206	27.6109	33.5821	28.0426	27.3815	41.2903	40.9639	43.9367
6w	38.8456	41.2813	31.7597	46.7351	39.7059	35.5673	48.172	46.9019	48.0668
7w	42.2777	47.6879	39.7711	50.3265	42.9006	34.562	51.1398	50.4303	52.768
8w	41.7577	43.8343	39.8665	54.291	45.7404	40.5457	54.4086	51.8933	53.8225
9w	45.5018	47.8324	45.3028	50	46.6531	40.4021	55.6989	55.895	53.2074
10w	49.402	48.8439	48.927	52.1922	43.9148	40.1628	65.8495	65.0172	61.116
11w	55.9542	50.9634	53.505	59.0485	47.6673	45.6678	63.3118	68.0723	63.6643
12w	60.4264	55.395	57.6538	61.4739	50.8621	45.7635	66.2366	71.4286	65.0264
13w	67.1347	62.0424	59.7043	64.0858	56.5416	46.673	74.6237	76.1188	71.6169
14w	70.0988	62.2832	63.9485	66.5112	63.4381	48.7793	83.0538	80.5938	80.0967
15w	76.8591	72.2543	70.8631	72.4347	67.5963	53.6142	88.9462	87.0052	86.8629
16w	78.1071	70.5684	76.681	77.9384	75.355	59.4064	88.086	86.9191	90.6415

## Sheet: Figure S2E
Group	male	Liver index(%)	ALT in serum(IU/L)	Cholesterol in serum(mmol/L)	Triglycerides in serum(mmol/L)	Cholesterol in liver(mmol/g)	Triglycerides in liver(mmol/g)			t` test	P value	P value summary	Significantly different (P < 0.05)?
Clec4f cre	M1	4.20933	5.74	4.2148	0.9741	0.0161555	0.0586289		Liver index(%)	Clec4f cre VS Chi3l1-KpKO HFHC 16w	0.031	*	Yes
	M2	4.34193	31.06	4.1049	0.9915	0.012473	0.0387713		ALT in serum(IU/L)	Clec4f cre VS Chi3l1-KpKO HFHC 16w	0.02	*	Yes
	M3	5.20186	48.6	3.995	0.5857	0.0166087	0.0620227		Cholesterol in serum(mmol/L)	Clec4f cre VS Chi3l1-KpKO HFHC 16w	0.02	*	Yes
	M4	4.96602	27.58	3.8112	1.1083	0.0178551	0.0657054		Triglycerides in serum(mmol/L)	Clec4f cre VS Chi3l1-KpKO HFHC 16w	0.7484	ns	No
	M5	4.52745	32.63	4.0606	0.7262	0.0116044	0.0397203		Cholesterol in liver(mmol/g)	Clec4f cre VS Chi3l1-KpKO HFHC 16w	0.047	*	Yes
	M6	4.80884	43.61	3.3019	0.7799	0.0175151	0.0687382		Triglycerides in liver(mmol/g)	Clec4f cre VS Chi3l1-KpKO HFHC 16w	0.1288	ns	No
Chi3l1-KpKO	M1	5.39786	60.86	5.1129	0.892	0.0189126	0.059908
	M2	5.08163	62.33	4.5762	0.8573	0.0203478	0.0761861
	M3	5.50847	53.8	4.293	0.952	0.0186293	0.074876

## Sheet: Figure S2F
Glucose tolerance											t` test	P value	P value summary	Significantly different (P < 0.05)?
Group	male	0min	15min	30min	60min	90min	120min	AUC		AUC	Clec4f cre VS Chi3l1-KpKO HFHC 16w	0.035	*	Yes
Clec4f cre	M1	4.8	18.6	22.1	14	11.2	10.4	1724
	M2	4.9	17	19.3	15.9	10.3	10.2	1665
	M3	4.7	13	13.9	12.7	10.9	9.7	1397
	M4	4.7	13.8	22	14	12.5	9.7	1678
	M5	4.6	17.5	21.9	18.1	11.3	9	1807
	M6	5	14.2	19.3	13	8.8	8.9	1472
Chi3l1-KpKO	M1	4.8	18.4	20.6	17.4	11.2	9.9	1782
	M2	5.5	20.7	20.4	15.3	16.4	11	1927
	M3	7.4	20.4	19.6	18.2	14.6	10.3	1941

## Sheet: Figure S2G
Insulin resistance											t` test	P value	P value summary	Significantly different (P < 0.05)?
Group	male	0min	15min	30min	60min	90min	120min	AUC		AUC	Clec4f cre VS Chi3l1-KpKO HFHC 16w	0.0174	*	Yes
Clec4f cre	M1	9.5	7.7	5.9	4.8	4.8	6.7	708
	M2	10.4	7.9	5.9	5.4	6.3	6.7	780.8
	M3	8.9	8	6	5.2	5.7	8.2	771.8
	M4	7.4	7.8	6.5	5.1	5.3	6.6	729.8
	M5	8	6.5	4.7	4.1	5.3	5.5	627.8
	M6	8.2	7.8	4.8	5.4	4.9	5	670.5
Chi3l1-KpKO	M1	10.3	8.3	6.9	6	6.5	7.6	846
	M2	9.8	9.2	8.1	5.8	5.7	7	843.8
	M3	7.3	8.6	5.7	5.9	6	8.5	796.5
