# Supplementary material for: Differential regulation of hepatic macrophage fate by Chi3l1 in metabolic dysfunction-associated steatotic liver disease
Source: eLife. 2026 Jun 26;14:RP107023. doi: 10.7554/eLife.107023 (PMC13309125; doi:10.7554/eLife.107023)
Supplement: Figure 2—source data 1. [file elife-107023-fig2-data1.xlsx]

## Sheet: Figure 2A
Weight(g)																																One-way analysis of variance (ANOVA)	P value	P value summary	Significantly different (P < 0.05)?
	Chi3l1fl/fl NCD				Chi3l1-KpKO NCD				Chi3l1fl/fl HFHC										Chi3l1-KpKO HFHC													Chi3l1fl/fl NCD VS Chi3l1-KpKO NCD	0.732	ns	No
Weeks	M1	M2	M3	M4	M1	M2	M3	M4	M1	M2	M3	M4	M5	M6	M7	M8	M9	M10	M1	M2	M3	M4	M5	M6	M7	M8	M9	M10	M11	M12		Chi3l1fl/fl NCD VS Chi3l1fl/fl HFHC	0.007	**	Yes
0w	24.65	25.19	22.41	22.93	23.28	24.31	23.2	25.35	20.84	20.39	21.6	20.9	19.29	22.9	23.59	22.34	22.43	21.43	23.61	22	21.16	24.82	20.08	22.19	22.52	23.29	22.47	23.01	22.86	22.27		Chi3l1fl/fl NCD VS Chi3l1-KpKO HFHC	<0.001	***	Yes
1w	24.83	25.32	22.97	23.51	23.77	24.81	23.68	25.4	23.08	22.74	23.32	23.25	20.47	23.09	22.54	22.7	23.34	22.36	25.97	24.6	23.27	25.09	22.33	24.21	23.61	24.54	23.87	23.84	24.92	23.34		Chi3l1-KpKO NCD VS Chi3l1fl/fl HFHC	0.019	*	Yes
2w	25.16	25.62	23.04	23.67	23.88	25.01	23.4	26.45	24.45	23.2	23.58	25.1	22.06	25.13	23.65	23.33	23.93	23.03	27.27	27.1	24.82	27.16	24.44	26.01	23.79	24.73	24.53	24.74	26.13	23.58		Chi3l1-KpKO NCD VS Chi3l1-KpKO HFHC	<0.001	***	Yes
3w	25.43	25.85	23.22	24.17	23.56	25.38	24.78	27.38	26.01	24.42	24.94	27.38	23.6	25.57	23.98	24.08	23.89	23.53	29.65	30.16	27.45	29.49	25.12	28.84	25.47	26.05	26.69	26.39	28.15	25.36		Chi3l1fl/fl HFHC VS Chi3l1-KpKO HFHC	<0.001	***	Yes
4w	25.8	26.11	23.37	24.24	23.92	25.39	24.14	27.68	27.93	26.41	26.45	29.41	25.01	25.2	24.61	24.77	24.65	23.75	31.93	31.58	28.87	31.41	27.07	29.51	26.47	27.11	28.15	27.78	29.75	26.54
5w	26.02	26.19	23.47	24.55	24.41	25.38	24.59	27.8	28.84	27.21	27.51	30.53	25.68	25.48	24.79	25.09	24.65	24.03	33.88	32.75	30.39	34.01	27.58	29.45	27.62	26.7	27.02	26.68	28.66	25.45
6w	26.22	26.26	23.54	24.71	24.5	25.47	24.48	28.42	30.6	28.22	28.57	32.07	26.19	27.72	25.7	26.36	25.95	25.07	34.87	33.66	31.33	37.85	29.8	28.71	27.67	27.22	28.45	27.43	30.15	26.37
7w	26.47	26.42	23.65	25.09	24.59	25.89	25.14	29.56	31.06	28.88	28.89	31.94	26.81	28.13	26.08	26.77	26.73	25.9	36.59	36.07	32.75	38.65	30.1	30.72	29.35	27.69	29.8	27.62	30.81	27.8
8w	26.65	26.81	24.97	26.32	24.68	25.56	25.62	31.07	32.52	29.34	30.38	32.12	27.38	28.61	26.19	27.15	26.33	26.16	38.52	37.87	33.77	40.01	31.49	30.79	28.47	28.28	30.38	28.22	31.66	27.94
9w	26.94	27.85	26.17	27.02	24.95	26.89	26.69	31.28	33.45	30.5	30.72	33.44	28.07	29.88	26.58	28.28	26.94	26.87	39.29	37.42	33.55	39.65	32.07	31.82	29.27	29.26	31.9	29.75	32.49	28.48
10w	27.53	28.32	27.04	27.28	25.31	26.94	27.93	32.06	33.995	31.26	30.19	33.76	28.505	31.4	26.88	29.22	27.8	27.11	39.4	38.81	33.95	40.43	32.44	32.54	29.85	30	33.34	30.79	33.87	29.47
11w	27.72	28.75	27.18	27.39	25.75	27.38	28.2	32.19	35.67	32.74	33.28	32.5	30.78	31.76	27.03	29.59	28.95	27.94	41.19	40.32	35.17	41.75	33.03	33.46	31.87	31.17	34.22	31.3	34.96	30.52
12w	28.24	28.95	27.33	28.27	25.93	27.81	28.25	32.83	36.82	33.08	34.69	31.87	30.5	34.01	29.06	32.06	30.45	29.34	43.11	41.71	36.7	42.84	35.15	35.06	33.97	32.87	36.25	32.92	37.88	32.69
13w	28.21	29.35	27.48	28.57	26.24	27.54	28.37	33.11	37.04	33.59	33.32	31.56	30.23	35.36	29.78	32.78	31.94	31.82	43.06	41.87	36.76	43.73	35.93	35.62	34.24	33.41	38.24	24.19	40.04	33.66
14w	28.47	29.65	27.83	29.58	26.94	28.31	28.75	33.39	38.05	33.43	33.69	31.9	29.37	36.94	30.27	35.04	32.72	32.5	42.05	41.37	37.01	42.71	37.71	36.44	37.12	36.32	41	35.16	41.14	36.07
15w	29.52	30.85	28.21	29.9	27.63	29.41	29.07	34.02	39.54	34.09	34.63	30.21	30.43	37.56	31.26	35.65	33.39	33.42	43.32	42.85	37.44	44.57	38.16	38.4	39.02	37.04	42.41	35.68	41.78	36.02
16w	29.92	31.15	28.51	30.3	28.23	29.91	29.77	34.72	40.81	35.46	36.54	31.86	32.21	37.81	30.98	35.05	34.17	33.46	44.32	43.88	38.26	45.14	39.97	40.46	41.17	37.54	42.41	35.91	42.41	37.71

## Sheet: Figure 2B
The percentage initial mass																																One-way analysis of variance (ANOVA)	P value	P value summary	Significantly different (P < 0.05)?
	Chi3l1fl/fl NCD				Chi3l1-KpKO NCD				Chi3l1fl/fl HFHC										Chi3l1-KpKO NCD													Chi3l1fl/fl NCD VS Chi3l1-KpKO NCD	0.893	ns	No
Weeks	M1	M2	M3	M4	M1	M2	M3	M4	M1	M2	M3	M4	M5	M6	M7	M8	M9	M10	M1	M2	M3	M4	M5	M6	M7	M8	M9	M10	M11	M12		Chi3l1fl/fl NCD VS Chi3l1fl/fl HFHC	<0.001	***	Yes
0w	0	0	0	0	0	0	0	0	0	0	0	0	0	0	0	0	0	0	0	0	0	0	0	0	0	0	0	0	0	0		Chi3l1fl/fl NCD VS Chi3l1-KpKO HFHC	<0.001	***	Yes
1w	0.730223	0.516078	2.49888	2.52944	2.10481	2.05677	2.06897	0.197239	10.7486	11.5253	7.96296	11.244	6.11716	0.829694	-4.45104	1.61146	4.05707	4.33971	9.99576	11.8182	9.97164	1.08783	11.2052	9.1032	4.84014	5.36711	6.23053	3.60713	9.01137	4.80467		Chi3l1-KpKO NCD VS Chi3l1fl/fl HFHC	<0.001	***	Yes
2w	2.06897	1.70703	2.81124	3.22721	2.57732	2.87947	0.862069	4.33925	17.3225	13.7813	9.16667	20.0957	14.3598	9.73799	0.254345	4.43151	6.68747	7.46617	15.5019	23.1818	17.2968	9.42788	21.7131	17.215	5.63943	6.18291	9.16778	7.51847	14.3045	5.88235		Chi3l1-KpKO NCD VS Chi3l1-KpKO HFHC	<0.001	***	Yes
3w	3.1643	2.62009	3.61446	5.40776	1.20275	4.40148	6.81034	8.00789	24.8081	19.7646	15.463	31.0048	22.3432	11.6594	1.65324	7.78872	6.50914	9.79935	25.5824	37.0909	29.7259	18.8155	25.0996	29.9685	13.0995	11.8506	18.7806	14.6893	23.1409	13.8752		Chi3l1fl/fl HFHC VS Chi3l1-KpKO HFHC	0.003	**	Yes
4w	4.66531	3.65224	4.2838	5.71304	2.74914	4.44262	4.05172	9.19132	34.0211	29.5243	22.4537	40.7177	29.6527	10.0437	4.32387	10.8774	9.89746	10.8259	35.2393	43.5455	36.4367	26.5512	34.8108	32.9878	17.54	16.4019	25.2781	20.7301	30.14	19.1738
5w	5.55781	3.96983	4.73003	7.06498	4.85395	4.40148	5.99138	9.66469	38.3877	33.4478	27.3611	46.0766	33.126	11.2664	5.0869	12.3098	9.89746	12.1325	43.4985	48.8636	43.62	37.0266	37.3506	32.7174	22.6465	14.6415	20.2492	15.9496	25.3718	14.2793
6w	6.36917	4.24772	5.04239	7.76276	5.24055	4.7717	5.51724	12.1105	46.833	38.4012	32.2685	53.445	35.7698	21.048	8.94447	17.9946	15.6933	16.9855	47.6917	53	48.0624	52.498	48.4064	29.3826	22.8686	16.8742	26.6133	19.209	31.8898	18.4104
7w	7.38337	4.88289	5.53324	9.41997	5.62715	6.49938	8.36207	16.6075	49.0403	41.6381	33.75	52.823	38.9839	22.8384	10.5553	19.8299	19.1708	20.8586	54.9767	63.9545	54.7732	55.7212	49.9004	38.4407	30.3286	18.8922	32.6213	20.0348	34.7769	24.8316
8w	8.11359	6.43112	11.4235	14.7841	6.01375	5.14192	10.431	22.5641	56.0461	43.8941	40.6481	53.6842	41.9388	24.9345	11.0216	21.5309	17.3874	22.0719	63.1512	72.1364	59.5936	61.2006	56.8227	38.7562	26.421	21.4255	35.2025	22.6423	38.4952	25.4603
9w	9.29006	10.5597	16.7782	17.8369	7.17354	10.6129	15.0431	23.3925	60.5086	49.5831	42.2222	60	45.5158	30.4803	12.6749	26.5891	20.107	25.385	66.4125	70.0909	58.5539	59.7502	59.7112	43.3979	29.9734	25.6333	41.9671	29.2916	42.126	27.885
10w	11.6836	12.4256	20.6604	18.9708	8.71993	10.8186	20.3879	26.4694	63.1238	53.3104	39.7685	61.5311	47.7709	37.1179	13.9466	30.7968	23.9412	26.5049	66.8784	76.4091	60.4442	62.8928	61.5538	46.6426	32.5488	28.8106	48.3756	33.8114	48.1627	32.3305
11w	12.4544	14.1326	21.2851	19.4505	10.61	12.6285	21.5517	26.9822	71.1612	60.5689	54.0741	55.5024	59.5645	38.69	14.5825	32.453	29.0682	30.378	74.46	83.2727	66.2098	68.2111	64.492	50.7886	41.5187	33.8343	52.2919	36.0278	52.9309	37.0454
12w	14.5639	14.9266	21.9545	23.2883	11.3832	14.3974	21.7672	29.5069	76.6795	62.2364	60.6019	52.488	58.113	48.5153	23.1878	43.5094	35.7557	36.9109	82.5921	89.5909	73.4405	72.6027	75.0498	57.9991	50.8437	41.1335	61.3262	43.0682	65.7043	46.7894
13w	14.4422	16.5145	22.6238	24.5966	12.7148	13.2867	22.2845	30.6114	77.7351	64.7376	54.2593	51.0048	56.7133	54.4105	26.2399	46.7323	42.3986	48.4834	82.3803	90.3182	73.724	76.1886	78.9343	60.5228	52.0426	43.4521	70.1825	5.12821	75.1531	51.145
14w	15.497	17.7054	24.1856	29.0013	15.7216	16.4541	23.9224	31.716	82.5816	63.9529	55.9722	52.6316	52.2551	61.31	28.3171	56.8487	45.8761	51.6566	78.1025	88.0455	74.9055	72.079	87.7988	64.2181	64.8313	55.9468	82.4655	52.8031	79.965	61.9668
15w	19.7566	22.4692	25.8813	30.3969	18.6856	20.979	25.3017	34.2012	89.7313	67.1898	60.3241	44.5455	57.7501	64.0175	32.5138	59.5792	48.8631	55.9496	83.4816	94.7727	76.9376	79.5729	90.0398	73.0509	73.2682	59.0382	88.7405	55.063	82.7647	61.7423
16w	21.3793	23.6602	27.22	32.1413	21.2629	23.0358	28.319	36.9625	95.8253	73.9088	69.1667	52.4402	66.9777	65.1092	31.3268	56.8935	52.3406	56.1363	87.7171	99.4545	80.8129	81.8695	99.0538	82.3344	82.8153	61.1851	88.7405	56.0626	85.5206	69.3309

## Sheet: Figure 2D
Group	male	Liver index(%)	ALT in serum(IU/L)	Cholesterol in serum(mmol/L)	Triglycerides in serum(mmol/L)	Cholesterol in liver(mmol/g)	Triglycerides in liver(mmol/g)		Liver index(%)	One-way analysis of variance (ANOVA)	P value	P value summary	Significantly different (P < 0.05)?
Chi3l1fl/fl NCD	M1	3.94385	10.3	2.70977	0.011463	1.2341	0.012069			Chi3l1fl/fl NCD VS Chi3l1-KpKO NCD	0.955	ns	No
	M2	4.17335	12.56	2.16188	0.011049	1.0896	0.011778			Chi3l1fl/fl NCD VS Chi3l1fl/fl HFHC	0.01	*	Yes
	M3	4.4195	15.41	1.95553	0.012953	0.803	0.013761			Chi3l1fl/fl NCD VS Chi3l1-KpKO HFHC	<0.001	***	Yes
	M4	4.19142	25.68	2.31065	0.014691	0.9512	0.019198			Chi3l1-KpKO NCD VS Chi3l1fl/fl HFHC	0.012	*	Yes
Chi3l1-KpKO NCD	M1	4.46334	6.92	3.40959	0.015933	1.07	0.013233			Chi3l1-KpKO NCD VS Chi3l1-KpKO HFHC	<0.001	***	Yes
	M2	4.31294	20.31	2.21947	0.014029	0.7785	0.010178			Chi3l1fl/fl HFHC VS Chi3l1-KpKO HFHC	0.001	**	Yes
	M3	4.16527	14.72	3.31361	0.019078	0.89	0.014579
	M4	3.91705	28.61	2.31065	0.01734	0.8165	0.018289		ALT in serum(IU/L)	One-way analysis of variance (ANOVA)	P value	P value summary	Significantly different (P < 0.05)?
Chi3l1fl/fl HFHC	M1	6.05244	133.44	5.9485	0.030194	2.17158	0.03367			Chi3l1fl/fl NCD VS Chi3l1-KpKO NCD	0.945	ns	No
	M2	5.13254	70.74	4.2901	0.019249	1.93908	0.060732			Chi3l1fl/fl NCD VS Chi3l1fl/fl HFHC	0.022	*	Yes
	M3	5.22715	100.72	4.8492	0.018017	1.91151	0.029521			Chi3l1fl/fl NCD VS Chi3l1-KpKO HFHC	<0.001	***	Yes
	M4	5.08475	76.13	4.5	0.026028	1.62023	0.028425			Chi3l1-KpKO NCD VS Chi3l1fl/fl HFHC	0.026	*	Yes
	M5	5.27786	86.08	5.0568	0.013938	1.61503	0.034339			Chi3l1-KpKO NCD VS Chi3l1-KpKO HFHC	<0.001	***	Yes
	M6	6.6197	27.28	4.82765	0.015202	0.9019	0.028836			Chi3l1fl/fl HFHC VS Chi3l1-KpKO HFHC	0.015	*	Yes
	M7	4.702	41.53	3.26563	0.016281	1.2963	0.025298
	M8	5.7546	63.19	3.66484	0.018205	1.2043	0.032862		Cholesterol in serum(mmol/L)	One-way analysis of variance (ANOVA)	P value	P value summary	Significantly different (P < 0.05)?
	M9	6.298	21.88	4.23116	0.020012	1.2911	0.034387			Chi3l1fl/fl NCD VS Chi3l1-KpKO NCD	0.401	ns	No
	M10	5.0124	28.12	4.59556	0.02835	1.2069	0.053975			Chi3l1fl/fl NCD VS Chi3l1fl/fl HFHC	<0.001	***	Yes
Chi3l1-KpKO NCD	M1	7.12996	105.35	7.2555	0.031691	2.13517	0.030751			Chi3l1fl/fl NCD VS Chi3l1-KpKO HFHC	<0.001	***	Yes
	M2	8.04467	142.58	6.6846	0.029197	2.16117	0.041517			Chi3l1-KpKO NCD VS Chi3l1fl/fl HFHC	0.003	**	Yes
	M3	5.85468	64.93	5.8329	0.028903	3.45112	0.037184			Chi3l1-KpKO NCD VS Chi3l1-KpKO HFHC	<0.001	***	Yes
	M4	8.32964	172.35	8.645	0.025675	2.34842	0.03536			Chi3l1fl/fl HFHC VS Chi3l1-KpKO HFHC	<0.001	***	Yes
	M5	4.97873	103.94	5.0025	0.041844	1.55261	0.057754
	M6	6.20366	128.37	6.024	0.028522	1.84493	0.047833		Triglycerides in serum(mmol/L)	One-way analysis of variance (ANOVA)	P value	P value summary	Significantly different (P < 0.05)?
	M7	6.04809	143.25	5.4366	0.035065	2.02594	0.049497			Chi3l1fl/fl NCD VS Chi3l1-KpKO NCD	0.37	ns	No
	M8	7.75925	75.61	5.08975	0.034588	1.6513	0.068793			Chi3l1fl/fl NCD VS Chi3l1fl/fl HFHC	0.041	*	Yes
	M9	8.12292	82.87	4.61827	0.030711	2.1665	0.067909			Chi3l1fl/fl NCD VS Chi3l1-KpKO HFHC	<0.001	***	Yes
	M10	5.77434	35.41	5.94494	0.047939	2.9609	0.090996			Chi3l1-KpKO NCD VS Chi3l1fl/fl HFHC	0.297	ns	No
	M11	6.65281	62.2	6.57692	0.046015	1.9794	0.074665			Chi3l1-KpKO NCD VS Chi3l1-KpKO HFHC	<0.001	***	Yes
	M12	7.58421	112.7	5.70418	0.021616	2.1339	0.041245			Chi3l1fl/fl HFHC VS Chi3l1-KpKO HFHC	<0.001	***	Yes
									Cholesterol in liver(mmol/g)	One-way analysis of variance (ANOVA)	P value	P value summary	Significantly different (P < 0.05)?
										Chi3l1fl/fl NCD VS Chi3l1-KpKO NCD	0.668	ns	No
										Chi3l1fl/fl NCD VS Chi3l1fl/fl HFHC	0.059	ns	No
										Chi3l1fl/fl NCD VS Chi3l1-KpKO HFHC	<0.001	***	Yes
										Chi3l1-KpKO NCD VS Chi3l1fl/fl HFHC	0.019	*	Yes
										Chi3l1-KpKO NCD VS Chi3l1-KpKO HFHC	<0.001	***	Yes
										Chi3l1fl/fl HFHC VS Chi3l1-KpKO HFHC	0.001	**	Yes
									Triglycerides in liver(mmol/g)	One-way analysis of variance (ANOVA)	P value	P value summary	Significantly different (P < 0.05)?
										Chi3l1fl/fl NCD VS Chi3l1-KpKO NCD	0.989	ns	No
										Chi3l1fl/fl NCD VS Chi3l1fl/fl HFHC	0.013	*	Yes
										Chi3l1fl/fl NCD VS Chi3l1-KpKO HFHC	<0.001	***	Yes
										Chi3l1-KpKO NCD VS Chi3l1fl/fl HFHC	0.013	*	Yes
										Chi3l1-KpKO NCD VS Chi3l1-KpKO HFHC	<0.001	***	Yes
										Chi3l1fl/fl HFHC VS Chi3l1-KpKO HFHC	0.007	**	Yes

## Sheet: Figure 2E
Glucose tolerance										One-way analysis of variance (ANOVA)	P value	P value summary	Significantly different (P < 0.05)?
Group	male	0min	15min	30min	60min	90min	120min	AUC		Chi3l1fl/fl NCD VS Chi3l1-KpKO NCD	0.774	ns	No
Chi3l1fl/fl NCD	M1	4.2	15.9	15.6	12.3	8.7	5.5	1334		Chi3l1fl/fl NCD VS Chi3l1fl/fl HFHC	0.035	*	Yes
	M2	4.8	16.4	13.2	9.9	9.3	7.4	1266		Chi3l1fl/fl NCD VS Chi3l1-KpKO HFHC	<0.001	***	Yes
	M3	5.6	15.4	11.2	9.8	8.9	8.3	1211		Chi3l1-KpKO NCD VS Chi3l1fl/fl HFHC	0.016	*	Yes
	M4	4.4	12.5	13	8.9	7.2	6.2	1089		Chi3l1-KpKO NCD VS Chi3l1-KpKO HFHC	<0.001	***	Yes
Chi3l1-KpKO NCD	M1	4.2	15.8	15.6	9.8	6	4.7	1164		Chi3l1fl/fl HFHC VS Chi3l1-KpKO HFHC	0.001	**	Yes
	M2	4.5	14.8	16.8	9.7	7.8	7.7	1274
	M3	3.9	10.4	12.5	9.4	7	5.6	1043
	M4	5	14.6	15.1	10.5	7.7	6.6	1241
Chi3l1fl/fl HFHC	M1	4.2	20.4	19.9	15.2	12.5	11.5	1789
	M2	4.2	18.1	16.2	13.5	9.6	8.6	1490
	M3	4	17.5	22.2	15.7	12.5	8.5	1766
	M4	4.7	18.4	18.5	9.7	8.6	8.1	1398
	M5	4.1	13.9	17.4	13	10.7	8.2	1465
	M6	5.8	21.5	17.7	12.3	10.3	8.5	1570
	M7	3.9	18	16.4	11.2	7.4	5.7	1312
	M8	5.4	18.6	15.5	10.3	7.9	6.3	1309
	M9	4.4	19.9	18.1	12.8	11.1	9.2	1594
	M10	5.6	18.9	16.3	11.3	9.5	7.2	1424
Chi3l1-KpKO HFHC	M1	5.3	15.1	22.3	13.9	13.8	13.8	1806
	M2	6.2	22.3	19.7	19.6	15	13.4	2063
	M3	7.3	18.1	24.4	17.7	14	12.1	2008
	M4	5.8	21.2	23.5	20.3	15.4	13	2156
	M5	4.6	21	19	14.4	11.2	9.7	1691
	M6	5.1	21.9	20.6	16.6	14.8	12.8	1964
	M7	5.3	18.5	18.3	15.3	10.4	9.4	1641
	M8	4.8	19.3	23.1	19.1	14.3	13.8	2054
	M9	4.3	13.7	15.3	13.7	11.7	8.7	1475
	M10	3.5	11.2	15	12.3	9.4	7.5	1295
	M11	6.9	18.9	24.8	18.3	15.3	12.9	2095
	M12	8.4	24.1	26	18.7	14.8	11.5	2187

## Sheet: Figure 2F
Insulin resistance										One-way analysis of variance (ANOVA)	P value	P value summary	Significantly different (P < 0.05)?
Group	male	0min	15min	30min	60min	90min	120min	AUC		Chi3l1fl/fl NCD VS Chi3l1-KpKO NCD	0.313	ns	No
Chi3l1fl/fl NCD	M1	6.9	5.4	4	3.6	3.7	3.7	497.3		Chi3l1fl/fl NCD VS Chi3l1fl/fl HFHC	0.038	*	Yes
	M2	8	5.8	4.2	4.3	5.5	5.1	612		Chi3l1fl/fl NCD VS Chi3l1-KpKO HFHC	<0.001	***	Yes
	M3	7	5	4.7	4.1	6.6	6.2	647.3		Chi3l1-KpKO NCD VS Chi3l1fl/fl HFHC	0.349	ns	No
	M4	5.5	3.5	3.7	3.5	4.1	6.1	496.5		Chi3l1-KpKO NCD VS Chi3l1-KpKO HFHC	<0.001	***	Yes
Chi3l1-KpKO NCD	M1	7.2	5.4	4.9	4.6	4.4	4.4	581.3		Chi3l1fl/fl HFHC VS Chi3l1-KpKO HFHC	0.001	**	Yes
	M2	6.6	6.9	4	5.9	6.1	6.5	700.5
	M3	7.3	6.5	4.3	6.2	7.1	5.9	736.5
	M4	6.9	5.5	5.1	5.3	4.4	5.1	616.5
Chi3l1fl/fl HFHC	M1	10.1	8.5	7.3	6.9	8.4	8.2	949.5
	M2	8	8.3	5.6	5.4	6.8	6.7	777
	M3	9.2	8.4	6.7	6.9	6.8	7.5	869.3
	M4	7.8	5.9	5.5	5.2	5.2	5	657.8
	M5	8.1	8.2	7.5	6.7	6.3	7.6	856.5
	M6	8.4	7.5	7	6.3	6.7	7.6	837
	M7	6.4	4.2	4.6	4.4	2.7	3.4	478.5
	M8	6.4	5.4	3.8	3.9	3.5	4.8	508.5
	M9	7.4	7.3	6	5.6	5.4	5.5	712.5
	M10	7.1	7	5.9	5.6	4.9	5	681
Chi3l1-KpKO HFHC	M1	8.3	8.2	8.9	6.6	8.1	8.5	954
	M2	7.5	7.7	7.6	6.6	7.5	6.2	858.8
	M3	6.9	7.9	7.5	7.1	6.8	7.2	864
	M4	9.7	10.7	10.4	9.7	9.8	11.8	1229
	M5	10.6	11	9.3	9.5	9	9	1144
	M6	11.5	10.4	7.9	7.6	8	9.3	1028
	M7	10.4	10.8	6.9	7	7.2	7.4	932.3
	M8	8.9	8.1	8.3	7.9	9.9	10.5	1067
	M9	8.3	9.7	6.8	6.7	8.4	6.7	914.3
	M10	7.3	7.8	6.6	5.4	5.5	6.4	743.3
	M11	9.1	9	8.8	7	7.7	7.3	1024
	M12	6.8	7	7.2	6.7	6.9	6.4	907.5
