# Supplementary material for: Differential regulation of hepatic macrophage fate by Chi3l1 in metabolic dysfunction-associated steatotic liver disease
Source: eLife. 2026 Jun 26;14:RP107023. doi: 10.7554/eLife.107023 (PMC13309125; doi:10.7554/eLife.107023)
Supplement: Figure 3—figure supplement 1—source data 1. [file elife-107023-fig3-figsupp1-data1.xlsx]

## Sheet: Figure S1B
Chi3l1 mRNA expression of KCs									t` test	P value	P value summary	Significantly different (P < 0.05)?
Group	Chi3l1	18S	dCt	2^-ddCt	Average	Normalize			Chi3l1fl/fl VS Chi3l1-MKO 0W	0.086312	ns	No
Chi3l1fl/fl 0w m1	30.6532	12.1456	18.5076	2.68321e-06	3.72103e-06	0.721093	0.777485		Chi3l1fl/fl VS Chi3l1-MKO 4W	0.036479	ns	No
	30.4297	12.1317	18.298	3.10288e-06		0.833877
Chi3l1fl/fl 0w m2	29.8611	11.805	18.0562	3.66902e-06		0.986022	1.29581
	29.3136	11.9608	17.3527	5.97451e-06		1.6056
Chi3l1fl/fl 0w m3	30.5338	12.4247	18.1091	3.53688e-06		0.950509	0.926702
	30.2923	12.1091	18.1832	3.3597e-06		0.902895
Chi3l1-MKO 0w m1	32.45	11.9836	20.4664	6.90241e-07		0.185497	0.557775
	30.6671	12.5266	18.1405	3.46076e-06		0.930053
Chi3l1-MKO 0w m2	31.354	12.3059	19.0482	1.84474e-06		0.49576	0.76826
	29.9891	12.0109	17.9782	3.87271e-06		1.04076
Chi3l1-MKO 0w m3	31.9635	12.5168	19.4467	1.39945e-06		0.37609	0.452232
	30.956	11.9998	18.9562	1.9661e-06		0.528374
Chi3l1fl/fl 4w m1	30.5277	12.2644	18.2633	3.17829e-06		0.85414	0.774342
	30.5279	11.9662	18.5617	2.58442e-06		0.694543
Chi3l1fl/fl 4w m2	29.1654	11.8768	17.2885	6.24647e-06		1.67869	1.40784
	29.7354	11.8847	17.8506	4.23078e-06		1.13699
Chi3l1fl/fl 4w m3	30.4331	12.5255	17.9076	4.06712e-06		1.09301	1.04607
	30.1925	12.1553	18.0371	3.71777e-06		0.999122
Chi3l1-MKO 4w m1	30.3108	11.4958	18.815	2.16834e-06		0.582725	0.331272
	33.4658	11.7828	21.683	2.97011e-07		0.0798195
Chi3l1-MKO 4w m2	31.3718	11.1628	20.209	8.25044e-07		0.221724	0.218
	31.6054	11.3471	20.2583	7.97327e-07		0.214276
Chi3l1-MKO 4w m3	30.7852	11.695	19.0902	1.79173e-06		0.481514	0.630012
	30.6048	12.2077	18.3971	2.89687e-06		0.778511
Chi3l1 mRNA expression of MoMFs									t` test	P value	P value summary	Significantly different (P < 0.05)?
Group	Chi3l1	18S	dCt	2^-ddCt	average	normalize			Chi3l1fl/fl VS Chi3l1-MKO 0W	0.002654	ns	No
Chi3l1fl/fl 0w m1	27.1263	11.5602	15.5662	2.06118e-05	1.31802e-05	1.56384	1.25737		Chi3l1fl/fl VS Chi3l1-MKO 4W	0.001008	ns	No
	27.5038	11.2199	16.2839	1.25329e-05		0.950888
Chi3l1fl/fl 0w m2	27.9492	11.4534	16.4957	1.08215e-05		0.82104	0.845036
	28.244	11.8302	16.4138	1.1454e-05		0.869031
Chi3l1fl/fl 0w m3	28.3624	12.0659	16.2965	1.24238e-05		0.942612	0.897599
	28.6361	12.1947	16.4414	1.12373e-05		0.852586
Chi3l1-MKO 0w m1	31.5822	12.8075	18.7747	2.2298e-06		0.169178	0.151738
	31.8285	12.7207	19.1078	1.77008e-06		0.134298
Chi3l1-MKO 0w m2	31.9347	11.9921	19.9426	9.92378e-07		0.0752931	0.0738625
	31.8666	11.8681	19.9985	9.54666e-07		0.0724319
Chi3l1-MKO 0w m3	31.8135	12.5168	19.2968	1.55273e-06		0.117808	0.14296
	31.2802	12.4964	18.7838	2.21575e-06		0.168112
Chi3l1fl/fl 4w m1	26.9898	11.5362	15.4537	2.22836e-05		1.69069	1.40245
	27.0784	11.0231	16.0552	1.46855e-05		1.11421
Chi3l1fl/fl 4w m2	27.2343	11.7947	15.4396	2.25019e-05		1.70725	1.59376
	27.1304	11.485	15.6454	1.95102e-05		1.48027
Chi3l1fl/fl 4w m3	27.2684	11.5868	15.6817	1.90259e-05		1.44352	1.11522
	28.2687	11.7117	16.557	1.03717e-05		0.786914
Chi3l1-MKO 4w m1	30.5507	12.2731	18.2776	3.14698e-06		0.238766	0.185923
	31.3155	12.1946	19.1209	1.75402e-06		0.13308
Chi3l1-MKO 4w m2	30.5488	12.1783	18.3705	2.95066e-06		0.223871	0.166821
	31.1244	11.7258	19.3987	1.44682e-06		0.109772
Chi3l1-MKO 4w m3	30.2428	11.9575	18.2853	3.1302e-06		0.237492	0.17096
	31.9249	12.4542	19.4707	1.37639e-06		0.104428
