# Supplementary material for: Differential regulation of hepatic macrophage fate by Chi3l1 in metabolic dysfunction-associated steatotic liver disease
Source: eLife. 2026 Jun 26;14:RP107023. doi: 10.7554/eLife.107023 (PMC13309125; doi:10.7554/eLife.107023)
Supplement: Figure 3—source data 1. [file elife-107023-fig3-data1.xlsx]

## Sheet: Figure 3A
	Chi3l1	18S	dCt	2^-ddCt	Average	Normalize	Normalize average		t` test	P value	P value summary	Significantly different (P < 0.05)?
WT NCD M1	33.2466	8.11046	25.1362	2.71179e-08		1.45505	1.62321		WT NCD VS WT MCD	0.009	**	Yes
	33.336	8.49982	24.8362	3.33858e-08		1.79136
WT NCD M2	33.6789	7.83145	25.8475	1.65629e-08		0.888705	0.736244
	34.3216	7.86789	26.4537	1.088e-08		0.583783
WT NCD M3	34.1275	7.85135	26.2761	1.23053e-08		0.660256	0.64055
	34.2246	7.85962	26.3649	1.15707e-08	1.86371e-08	0.620843
WT MCD M1	31.389	10.9399	20.4492	6.98528e-07		37.4805	35.3234
	31.274	10.6484	20.6256	6.18123e-07		33.1662
WT MCD M2	32.3671	10.9334	21.4337	3.53024e-07		18.942	17.3848
	32.413	10.7201	21.6929	2.9498e-07		15.8276
WT MCD M3	29.3807	8.27802	21.1027	4.44087e-07		23.8281	24.251
	30.4198	9.36746	21.0523	4.59848e-07		24.6738

## Sheet: Figure 3C
Weight(g)												t` test	P value	P value summary	Significantly different (P < 0.05)?
	Chi3l1fl/fl				Chi3l1-KpKO							Chi3l1fl/fl VS Chi3l1-KpKO MCD 6w	0.41606	ns	No
Weeks	M1	M2	M3	M4	M1	M2	M3	M4	M5	M6
0w	26.08	26.59	25.95	26.95	28.8	27.86	28.21	27.42	26.38	27.85
1w	22.3	22.55	22.15	23.26	22.23	23.08	23.65	21.78	21.06	22.73
2w	21.12	21.38	20.96	21.61	20.3	21.77	22.05	19.97	19.65	20.97
3w	18.82	19.8	19.19	19.8	18.61	20.26	20.12	18.93	17.71	20.23
4w	17.53	18.5	18.45	18.22	17.2	19.18	19.02	17.97	17.16	18.74
5w	16.6	17.45	17.41	17.35	16.11	18.38	18.25	17.07	16.75	17.88
6w	15.9	16.87	16.78	16.73	15.64	16.46	16.91	16.72	16.1	16.05

## Sheet: Figure 3D
Total MASLD activity score
Group	Steatosis(0-3)	Intralobular inflammation(0-3)	Ballooning of hepatocytes(0-2)	MASLD Activity Score	Average MASLD Activity Score		t` test	P value	P value summary	Significantly different (P < 0.05)?
Chi3l1fl/fl MCD 6w M1	2	1	1	4	4.6		Chi3l1fl/fl VS Chi3l1-KpKO MCD 6w	0.037	*	Yes
	2	1	1	4
	2	1	1	4
	2	3	1	6
	2	2	1	5
Chi3l1fl/fl MCD 6w M2	2	3	1	6	4.6
	2	3	1	6
	1	1	1	3
	1	2	1	4
	1	2	1	4
Chi3l1fl/fl MCD 6w M3	2	3	1	6	5.14286
	2	3	1	6
	1	2	1	4
	1	3	1	5
	1	3	1	5
	1	3	1	5
	1	3	1	5
Chi3l1fl/fl MCD 6w M4	2	3	1	6	5
	2	3	1	6
	1	2	1	4
	1	3	1	5
	2	2	1	5
	2	1	1	4
Chi3l1-KpKO MCD 6w M1	3	2	1	6	7
	3	3	2	8
	2	3	2	7
	2	3	1	6
	3	3	2	8
Chi3l1-KpKO MCD 6w M2	3	1	1	5	5.6
	3	2	2	7
	3	1	1	5
	3	2	1	6
	3	1	1	5
Chi3l1-KpKO MCD 6w M3	2	3	2	7	5.8
	3	2	2	7
	2	2	1	5
	3	1	1	5
	3	1	1	5
Chi3l1-KpKO MCD 6w M4	2	3	1	6	6.2
	3	3	2	8
	2	3	1	6
	2	3	1	6
	1	3	1	5
Chi3l1-KpKO MCD 6w M5	2	2	2	6	5.2
	2	2	1	5
	2	2	1	5
	2	2	1	5
	2	2	1	5
Chi3l1-KpKO MCD 6w M6	3	2	1	6	5
	3	2	1	6
	2	2	1	5
	2	1	1	4
	2	1	1	4
Relative Oil red O positive area							t` test	P value	P value summary	Significantly different (P < 0.05)?
Group	%Area	%Area Average	Average	Normalize			Chi3l1fl/fl VS Chi3l1-KpKO MCD 6w	0.002	*	Yes
Chi3l1fl/fl MCD 6w M1	9.54	10.2297	13.9762	0.731936
	9.111
	11.923
	9.246
	11.231
	11.161
	9.396
Chi3l1fl/fl MCD 6w M2	8.698	8.88		0.635364
	10.549
	9.806
	8.214
	7.133
Chi3l1fl/fl MCD 6w M3	17.095	18.2109		1.30299
	18.264
	14.122
	13.836
	21.422
	19.356
	21.643
	19.949
Chi3l1fl/fl MCD 6w M4	16.602	18.5844		1.32971
	15.746
	16.656
	16.06
	25.152
	22.688
	21.889
	13.882
Chi3l1-KpKO MCD 6w M1	25.977	23.713		1.69667
	27.537
	23.565
	24.603
	16.883
Chi3l1-KpKO MCD 6w M2	20.786	27.242		1.94917
	26.25
	29.693
	34.175
	25.306
Chi3l1-KpKO MCD 6w M3	28.119	23.822		1.70446
	24.853
	18.494
Chi3l1-KpKO MCD 6w M4	32.92	28.0594		2.00765
	23.596
	32.818
	28.114
	22.849
Chi3l1-KpKO MCD 6w M5	38.486	35.653		2.55097
	37.75
	36.771
	33.292
	31.966
Chi3l1-KpKO MCD 6w M6	27.607	25.8979		1.85299
	26.403
	25.588
	24.389
	26.075
	28.229
	22.994
Relative Sirius positive area							t` test	P value	P value summary	Significantly different (P < 0.05)?
Group	%Area	%Area Average	Average	Normalize			Chi3l1fl/fl VS Chi3l1-KpKO MCD 6w	0.03	*	Yes
Chi3l1fl/fl MCD 6w M1	1.822	1.50817	1.57728	0.956184
	1.997
	0.932
	1.716
	1.246
	1.336
Chi3l1fl/fl MCD 6w M2	1.894	1.61725		1.02534
	1.658
	1.263
	1.706
	1.732
	1.376
	1.767
	1.542
Chi3l1fl/fl MCD 6w M3	1.158	1.42086		0.900829
	1.575
	1.389
	1.347
	1.336
	1.887
	1.254
Chi3l1fl/fl MCD 6w M4	1.963	1.76283		1.11764
	1.339
	1.246
	2.626
	2.108
	1.295
Chi3l1-KpKO MCD 6w M1	2.115	2.2724		1.44071
	1.491
	2.624
	1.871
	3.261
Chi3l1-KpKO MCD 6w M2	2.752	2.99		1.89567
	3.002
	3.015
	3.815
	2.603
	2.753
Chi3l1-KpKO MCD 6w M3	2.591	2.95983		1.87655
	2.649
	2.475
	2.641
	4.665
	2.738
Chi3l1-KpKO MCD 6w M4	0.925	1.65433		1.04885
	0.773
	0.808
	1.428
	1.323
	4.669
Chi3l1-KpKO MCD 6w M5	1.32	1.74617		1.10708
	3.044
	1.536
	1.852
	1.567
	1.158
Chi3l1-KpKO MCD 6w M6	2.502	2.89783		1.83724
	2.135
	2.184
	2.798
	4.699
	3.069
Reative α-SMA positive area							t` test	P value	P value summary	Significantly different (P < 0.05)?
Group	%Area	%Area Average	Average	Normalize			Chi3l1fl/fl VS Chi3l1-KpKO MCD 6w	0.018	*	Yes
Chi3l1fl/fl MCD 6w M1	0.752	0.839	1.06093	0.790817
	0.939
	1.422
	0.688
	0.456
	0.835
	0.879
	0.755
	0.835
	0.835
	0.833
Chi3l1fl/fl MCD 6w M2	0.677	0.818111		0.771128
	0.555
	0.755
	0.807
	1.003
	1.488
	0.754
	0.853
	0.471
Chi3l1fl/fl MCD 6w M3	1.568	1.2576		1.18538
	0.721
	1.491
	1.533
	0.975
Chi3l1fl/fl MCD 6w M4	1.613	1.329		1.25268
	0.838
	1.492
	1.373
Chi3l1-KpKO MCD 6w M1	1.789	2.3245		2.19101
	1.931
	3.416
	2.162
Chi3l1-KpKO MCD 6w M2	1.602	2.1998		2.07347
	2.66
	1.794
	3.123
	1.82
Chi3l1-KpKO MCD 6w M3	1.8	2.5535		2.40686
	2.308
	3.964
	2.142
Chi3l1-KpKO MCD 6w M4	1.342	1.1906		1.12223
	1.332
	1.204
	0.968
	1.107
Chi3l1-KpKO MCD 6w M5	1.069	1.3506		1.27304
	1.362
	1.181
	1.872
	1.269
Chi3l1-KpKO MCD 6w M6	1.146	2.11875		1.99707
	2.382
	4.118
	0.829

## Sheet: Figure 3E
Group	male	Liver index(%)	ALT in serum(IU/L)	Cholesterol in serum(mmol/L)	Triglycerides in serum(mmol/L)	Cholesterol in liver(mmol/g)	Triglycerides in liver(mmol/g)			t` test	P value	P value summary	Significantly different (P < 0.05)?
Chi3l1fl/fl	M1	3.20755	154.62	0.2494	0.5759	0.013977	0.029696		Liver index(%)	Chi3l1fl/fl VS Chi3l1-KpKO MCD 6w	0.016	*	Yes
	M2	3.49733	178.07	0.2246	0.5865	0.014566	0.037556		ALT in serum(IU/L)	Chi3l1fl/fl VS Chi3l1-KpKO MCD 6w	0.7834	ns	No
	M3	3.51609	207.26	0.1725	0.4295	0.016587	0.03067		Cholesterol in serum(mmol/L)	Chi3l1fl/fl VS Chi3l1-KpKO MCD 6w	0.0371	*	Yes
	M4	3.5266	197.9	0.2172	0.4974	0.012125	0.031449		Triglycerides in serum(mmol/L)	Chi3l1fl/fl VS Chi3l1-KpKO MCD 6w	0.0418	*	Yes
Chi3l1-KpKO	M1	3.83632	153.29	0.216	0.9365	0.021723	0.061721		Cholesterol in liver(mmol/g)	Chi3l1fl/fl VS Chi3l1-KpKO MCD 6w	0.2647	ns	No
	M2	4.86027	97.79	0.899	1.1672	0.015408	0.048296		Triglycerides in liver(mmol/g)	Chi3l1fl/fl VS Chi3l1-KpKO MCD 6w	0.0017	**	Yes
	M3	4.55352	207.61	0.4618	0.8673	0.01465	0.047698
	M4	3.94737	212.66	0.5539	0.5751	0.016587	0.043566
	M5	3.6646	164.84	0.5662	0.5219	0.016503	0.049798
	M6	4.17445	225.85	0.3693	0.9081	0.013051	0.04415
