# Supplementary material for: Differential regulation of hepatic macrophage fate by Chi3l1 in metabolic dysfunction-associated steatotic liver disease
Source: eLife. 2026 Jun 26;14:RP107023. doi: 10.7554/eLife.107023 (PMC13309125; doi:10.7554/eLife.107023)
Supplement: Figure 5—figure supplement 1—source data 1. [file elife-107023-fig5-figsupp1-data1.xlsx]

## Sheet: Figure S1B
	TIM4+	TIM4+Cleaved caspase3+	TIM4+Cleaved caspase3+/TIM4+	Averge		t` test	P value	P value summary	Significantly different (P < 0.05)?
WT NCD m1	11	0	0	2.5641		WT VS Chi3l1-/- NCD	0.884	ns	No
	20	0	0			WT VS Chi3l1-/- HFHC	0.002	**	Yes
	13	1	7.69231
	13	1	7.69231
	14	0	0
	15	0	0
WT NCD m2	13	2	15.3846	3.79808
	12	0	0
	12	1	8.33333
	15	1	6.66667
	19	0	0
	14	0	0
	17	0	0
	14	0	0
WT NCD m3	12	0	0	0
	9	0	0
	8	0	0
	15	0	0
	11	0	0
	12	0	0
	15	0	0
WT NCD m4	13	0	0	0
	13	0	0
	12	0	0
	14	0	0
	17	0	0
	10	0	0
	13	0	0
	15	0	0
	13	0	0
Chi3l1-/- NCD m1	12	1	8.33333	2.48918
	14	0	0
	11	1	9.09091
	11	0	0
	14	0	0
	16	0	0
	15	0	0
Chi3l1-/- NCD m2	15	0	0	2.65625
	14	0	0
	12	0	0
	10	0	0
	13	0	0
	16	1	6.25
	12	1	8.33333
	15	1	6.66667
Chi3l1-/- NCD m3	11	0	0	1.11111
	12	0	0
	11	0	0
	12	0	0
	12	0	0
	9	0	0
	10	1	10
	11	0	0
	10	0	0
Chi3l1-/- NCD m4	12	0	0	0.757576
	12	1	8.33333
	12	0	0
	12	0	0
	9	0	0
	11	0	0
	11	0	0
	8	0	0
	11	0	0
	11	0	0
	10	0	0
WT HFHC m1	12	7	58.3333	40.0758
	10	2	20
	9	3	33.3333
	11	5	45.4545
	8	4	50
	12	4	33.3333
WT HFHC m2	15	6	40	37.702
	9	4	44.4444
	10	3	30
	11	4	36.3636
WT HFHC m3	9	3	33.3333	40.1134
	10	4	40
	8	4	50
	7	2	28.5714
	9	4	44.4444
	10	4	40
	9	4	44.4444
WT HFHC m4	6	3	50	47.3291
	8	3	37.5
	10	5	50
	10	6	60
	8	4	50
	10	4	40
	9	5	55.5556
	9	4	44.4444
	13	5	38.4615
WT HFHC m5	6	1	16.6667	31.3823
	8	2	25
	9	5	55.5556
	8	3	37.5
	4	1	25
	7	2	28.5714
WT HFHC m6	7	3	42.8571	40.9524
	8	4	50
	10	3	30
Chi3l1-/- HFHC m1	2	1	50	48.0159
	4	1	25
	3	1	33.3333
	2	1	50
	1	1	100
	9	4	44.4444
	6	2	33.3333
Chi3l1-/- HFHC m2	5	3	60	55.2208
	7	2	28.5714
	7	3	42.8571
	3	3	100
	4	2	50
	6	3	50
	7	4	57.1429
	11	7	63.6364
	5	3	60
	10	4	40
Chi3l1-/- HFHC m3	12	6	50	55.0876
	7	5	71.4286
	7	4	57.1429
	5	3	60
	7	4	57.1429
	9	4	44.4444
	11	5	45.4545
Chi3l1-/- HFHC m4	4	3	75	54.1005
	7	3	42.8571
	9	4	44.4444
