# Supplementary material for: Differential regulation of hepatic macrophage fate by Chi3l1 in metabolic dysfunction-associated steatotic liver disease
Source: eLife. 2026 Jun 26;14:RP107023. doi: 10.7554/eLife.107023 (PMC13309125; doi:10.7554/eLife.107023)
Supplement: Figure 5—figure supplement 2—source data 1. [file elife-107023-fig5-figsupp2-data1.xlsx]

## Sheet: Figure S2A
	TIM4+	TIM4+TUNEL+	TIM4+TUNEL+/TIM4+	TIM4+TUNEL+/TIM4+ Average			P value	P value summary	Significantly different (P < 0.05)?
Chi3l1fl/fl 0w M1	44	1	2.27273	0.324675		Chi3l1fl/fl VS Chi3l1-KpKO NCD	0.193038	ns	No
	48	0	0			Chi3l1fl/fl VS Chi3l1-KpKO MCD	0.019703	*	Yes
	64	0	0
	53	0	0
	56	0	0
	68	0	0
	56	0	0
Chi3l1fl/fl 0w M2	66	0	0	0.227675
	69	0	0
	72	0	0
	61	0	0
	67	0	0
	83	0	0
	51	0	0
	67	1	1.49254
	53	0	0
	59	0	0
	61	0	0
	59	1	1.69492
	60	0	0
	78	0	0
Chi3l1fl/fl 0w M3	57	0	0	0
	59	1	1.69492
	60	0	0
	68	0	0
	64	0	0
Chi3l1fl/fl 0w M4	44	0	0	0.519481
	50	0	0
	57	0	0
	49	0	0
	55	2	3.63636
	52	0	0
	59	0	0
Chi3l1-KpKO 0w M1	54	1	1.85185	0.591128
	55	0	0
	70	0	0
	72	0	0
	68	0	0
	59	1	1.69492
Chi3l1-KpKO 0w M2	58	0	0	0.297619
	51	0	0
	58	0	0
	56	1	1.78571
	62	0	0
	59	0	0
Chi3l1-KpKO 0w M3	50	0	0	0.333333
	48	0	0
	54	0	0
	50	1	2
	53	0	0
	45	0	0
Chi3l1-KpKO 0w M4	61	0	0	0.721248
	54	1	1.85185
	57	1	1.75439
	58	0	0
	63	0	0
Chi3l1fl/fl MCD 6w M1	35	18	51.4286	54.8914
	45	27	60
	37	20	54.0541
	36	18	50
	39	23	58.9744
Chi3l1fl/fl MCD 6w M2	42	26	61.9048	59.0064
	40	25	62.5
	41	23	56.0976
	39	23	58.9744
	36	20	55.5556
Chi3l1fl/fl MCD 6w M3	34	17	50	56.4476
	32	19	59.375
	37	18	48.6486
	37	23	62.1622
	25	14	56
	32	20	62.5
Chi3l1fl/fl MCD 6w M4	27	18	66.6667	58.4685
	38	20	52.6316
	31	16	51.6129
	27	17	62.963
Chi3l1-KpKO MCD 6w M1	30	24	80	71.3095
	28	22	78.5714
	30	18	60
	24	16	66.6667
Chi3l1-KpKO MCD 6w M2	26	21	80.7692	85.5219
	36	30	83.3333
	33	30	90.9091
	37	32	86.4865
	36	31	86.1111
Chi3l1-KpKO MCD 6w M3	28	26	92.8571	90.5334
	40	38	95
	31	29	93.5484
	37	35	94.5946
	30	23	76.6667
Chi3l1-KpKO MCD 6w M4	42	25	59.5238	64.9778
	33	20	60.6061
	35	21	60
	38	26	68.4211
	38	29	76.3158
	40	26	65
Chi3l1-KpKO MCD 6w M5	38	26	68.4211	72.2469
	27	19	70.3704
	30	23	76.6667
	34	25	73.5294
Chi3l1-KpKO MCD 6w M6	22	12	54.5455	61.3943
	25	15	60
	32	20	62.5
	28	19	67.8571
	29	18	62.069

## Sheet: Figure S2B
	TIM4+	TIM4+TUNEL+	TIM4+TUNEL+/TIM4+	TIM4+TUNEL+/TIM4+ Average			P value	P value summary	Significantly different (P < 0.05)?
Chi3l1fl/fl HFHC 0w M1	44	1	2.27273	0.324675		Chi3l1fl/fl VS Chi3l1-MKO NCD	0.263256	ns	No
	48	0	0			Chi3l1fl/fl VS Chi3l1-MKO HFHC	0.177641	ns	No
	64	0	0
	53	0	0
	56	0	0
	68	0	0
	56	0	0
Chi3l1fl/fl HFHC 0w M2	66	0	0	0.227675
	69	0	0
	72	0	0
	61	0	0
	67	0	0
	83	0	0
	51	0	0
	67	1	1.49254
	53	0	0
	59	0	0
	61	0	0
	59	1	1.69492
	60	0	0
	78	0	0
Chi3l1fl/fl HFHC 0w M3	57	0	0	0.338983
	59	1	1.69492
	60	0	0
	68	0	0
	64	0	0
Chi3l1fl/fl HFHC 0w M4	44	0	0	0.519481
	50	0	0
	57	0	0
	49	0	0
	55	2	3.63636
	52	0	0
	59	0	0
Chi3l1-MKO HFHC 0w M1	55	0	0	0.69317
	54	0	0
	59	0	0
	58	1	1.72414
	62	1	1.6129
	66	1	1.51515
	59	0	0
Chi3l1-MKO HFHC 0w M2	58	0	0	0.762127
	69	1	1.44928
	70	1	1.42857
	60	0	0
	61	0	0
	59	1	1.69492
Chi3l1-MKO HFHC 0w M3	57	0	0	0
	54	0	0
	63	0	0
	61	0	0
Chi3l1-MKO HFHC 0w M4	62	1	1.6129	1.5877
	64	1
	56	1	1.5625
Chi3l1fl/fl HFHC 20w M1	21	12	57.1429	60.0522
	22	13	59.0909
	19	12	63.1579
	15	9	60
	23	14	60.8696
Chi3l1fl/fl HFHC 20w M2	28	17	60.7143	58.479
	27	16	59.2593
	26	15	57.6923
	16	9	56.25
Chi3l1fl/fl HFHC 20w M3	22	12	54.5455	57.4793
	26	15	57.6923
	27	15	55.5556
	26	16	61.5385
	31	18	58.0645
Chi3l1fl/fl HFHC 20w M4	17	9	52.9412	58.0333
	20	12	60
	18	10	55.5556
	22	14	63.6364
Chi3l1fl/fl HFHC 20w M5	21	14	66.6667	61.6731
	25	16	64
	24	14	58.3333
	26	15	57.6923
Chi3l1-MKO HFHC 16w M1	18	11	61.1111	58.8866
	19	11	57.8947
	17	10	58.8235
	18	11	61.1111
	17	10	58.8235
	18	10	55.5556
Chi3l1-MKO HFHC 16w M2	17	12	70.5882	66.2942
	15	10	66.6667
	11	7	63.6364
	14	9	64.2857
Chi3l1-MKO HFHC 16w M3	17	11	64.7059	59.9428
	17	10	58.8235
	16	9	56.25
	17	10	58.8235
	18	11	61.1111
Chi3l1-MKO HFHC 16w M4	22	13	59.0909	58.5321
	20	12	60
	14	8	57.1429
	19	11	57.8947
Chi3l1-MKO HFHC 16w M5	15	10	66.6667	66.4777
	13	9	69.2308
	9	6	66.6667
	19	12	63.1579
	9	6	66.6667

## Sheet: Figure S2D
Number of total KCs/g liver(105)									P value	P value summary	Significantly different (P < 0.05)?
Weeks	Chi3l1fl/fl			Chi3l1-MKO				Chi3l1fl/fl 0w VS Chi3l1fl/fl 20w	0.057	ns	No
0w	21.902	14.152	10.9329	12.954	17.64	21.278		Chi3l1fl/fl 0w VS Chi3l1-MKO 0w	0.678	ns	No
20w	3.93966	4.25801	13.622	10.0806	5.67109	5.82526		Chi3l1fl/fl 0w VS Chi3l1-MKO 20w	0.055	ns	No
								Chi3l1fl/fl 20w VS Chi3l1-MKO 0w	0.029	*	Yes
								Chi3l1fl/fl 20w VS Chi3l1-MKO 20w	0.098	ns	No
								Chi3l1-MKO 0w VS Chi3l1-MKO 20w	0.028	*	Yes
Number of total MoMFs/g liver(105)									P value	P value summary	Significantly different (P < 0.05)?
Weeks	Chi3l1fl/fl			Chi3l1-MKO				Chi3l1fl/fl 0w VS Chi3l1fl/fl 20w	0.26	ns	No
0w	6.18302	3.08977	8.80294	9.6661	6.45938	10.5056		Chi3l1fl/fl 0w VS Chi3l1-MKO 0w	0.056	ns	No
20w	12.1834	13.0928	8.53315	12.2459	7.27972	4.72796		Chi3l1fl/fl 0w VS Chi3l1-MKO 20w	0.407	ns	No
								Chi3l1fl/fl 20w VS Chi3l1-MKO 0w	0.339	ns	No
								Chi3l1fl/fl 20w VS Chi3l1-MKO 20w	0.745	ns	No
								Chi3l1-MKO 0w VS Chi3l1-MKO 20w	0.213	ns	No
