# Supplementary material for: Differential regulation of hepatic macrophage fate by Chi3l1 in metabolic dysfunction-associated steatotic liver disease
Source: eLife. 2026 Jun 26;14:RP107023. doi: 10.7554/eLife.107023 (PMC13309125; doi:10.7554/eLife.107023)
Supplement: Figure 5—source data 1. [file elife-107023-fig5-data1.xlsx]

## Sheet: Figure 5D
Number of total KCs/liver(105)										Number of total KCs/liver(105)	t` test	P value	P value summary	Significantly different (P < 0.05)?
	WT				Chi3l1-/-						WT 0w VS Chi3l1-/- 0w	0.49	ns	No
HFHC 0w	17.051	14.085	16.855		12.641	11.562	15.889				WT 8w VS Chi3l1-/- 8w	0.009	**	Yes
HFHC 8w	10.721	16.625	15.007	16.358	8.248	12.612	8.956	8.437			WT 16w VS Chi3l1-/- 16w	0.927	ns	No
HFHC 16w	11.301	7.366	5.567	3.371	7.717	6.477	8.615	4.151			WT 0w VS WT 8w	0.49	ns	No
											WT 0w VS WT 16w	<0.001	***	Yes
											WT 8w VS WT 16w	<0.001	***	Yes
											Chi3l1-/- 0w VS Chi3l1-/- 8w	0.059	ns	No
											Chi3l1-/- 0w VS Chi3l1-/- 16w	0.003	**	Yes
											Chi3l1-/- 8w VS Chi3l1-/- 16w	0.122	ns	No
Number of total MoMFs/liver(105)										Number of total MoMFs/liver(105)	t` test	P value	P value summary	Significantly different (P < 0.05)?
	WT				Chi3l1-/-						WT 0w VS Chi3l1-/- 0w	0.539	ns	No
HFHC 0w	1.88296	1.98715	3.27746		2.66053	5.04419	3.05182				WT 8w VS Chi3l1-/- 8w	0.914	ns	No
HFHC 8w	3.28529	2.54583	2.95075	10.5426	8.00718	5.24191	2.4357	4.36615			WT 16w VS Chi3l1-/- 16w	0.22	ns	No
HFHC 16w	3.25737	9.18191	3.83595	5.51388	3.30387	3.24321	4.5163	2.24831			WT 0w VS WT 8w	0.191	ns	No
											WT 0w VS WT 16w	0.107	ns	No
											WT 8w VS WT 16w	0.715	ns	No
											Chi3l1-/- 0w VS Chi3l1-/- 8w	0.438	ns	No
											Chi3l1-/- 0w VS Chi3l1-/- 16w	0.888	ns	No
											Chi3l1-/- 8w VS Chi3l1-/- 16w	0.325	ns	No
Number of total KCs/g liver(105)										Number of total KCs/g liver(105)	t` test	P value	P value summary	Significantly different (P < 0.05)?
	WT				Chi3l1-/-						WT 0w VS Chi3l1-/- 0w	0.481	ns	No
HFHC 0w	12.574	11.513	13.272		11.244	8.556	13.58				WT 8w VS Chi3l1-/- 8w	0.019	*	Yes
HFHC 8w	7.604	14.2095	13.5195	11.328	6.4435	9.628	7.526	6.4405			WT 16w VS Chi3l1-/- 16w	0.346	ns	No
HFHC 16w	10.09	5.88998	4.454	3.43981	6.431	4.594	4.162	2.516			WT 0w VS WT 8w	0.653	ns	No
											WT 0w VS WT 16w	0.002	**	Yes
											WT 8w VS WT 16w	0.002	**	Yes
											Chi3l1-/- 0w VS Chi3l1-/- 8w	0.051	ns	No
											Chi3l1-/- 0w VS Chi3l1-/- 16w	0.001	**	Yes
											Chi3l1-/- 8w VS Chi3l1-/- 16w	0.07	ns	No
Number of total MoMFs/g liver(105)										Number of total MoMFs/g liver(105)	t` test	P value	P value summary	Significantly different (P < 0.05)?
	WT				Chi3l1-/-						WT 0w VS Chi3l1-/- 0w	0.404	ns	No
HFHC 0w	1.4052	1.65596	2.58068		2.41866	4.10097	2.60839				WT 8w VS Chi3l1-/- 8w	0.778	ns	No
HFHC 8w	2.32999	2.17592	2.65834	7.12339	6.25561	4.00145	2.0468	3.33294			WT 16w VS Chi3l1-/- 16w	0.04	*	Yes
HFHC 16w	2.90836	7.46497	3.06876	5.62641	2.75323	2.30015	2.18179	1.36261			WT 0w VS WT 8w	0.201	ns	No
											WT 0w VS WT 16w	0.037	*	Yes
											WT 8w VS WT 16w	0.324	ns	No
											Chi3l1-/- 0w VS Chi3l1-/- 8w	0.504	ns	No
											Chi3l1-/- 0w VS Chi3l1-/- 16w	0.491	ns	No
											Chi3l1-/- 8w VS Chi3l1-/- 16w	0.153	ns	No

## Sheet: Figure 5E
Group	TIM4+	TIM4+TUNEL+	TIM4+TUNEL+/TIM4+	TIM4+TUNEL+/TIM4+ Average				t` test	P value	P value summary	Significantly different (P < 0.05)?
WT 0w M1	52	0	0	0.37037				WT 0w VS Chi3l1-/- 0w	0.661	ns	No
	55	0	0					WT 8w VS Chi3l1-/- 8w	0.007	**	Yes
	54	1	1.85185					WT 16w VS Chi3l1-/- 16w	0.006	**	Yes
	59	0	0
	55	0	0
WT 0w M2	55	0	0	0.363636
	54	0	0
	53	0	0
	56	0	0
	55	1	1.81818
WT 0w M3	49	0	0	0.392157
	51	1	1.96078
	56	0	0
	56	0	0
	51	0	0
WT 0w M4	53	2	3.77358	1.773
	58	1	1.72414
	50	0	0
	62	1	1.6129
	57	1	1.75439
Chi3l1-/-0w M1	57	0	0	0
	60	0	0
	51	0	0
Chi3l1-/-0w M2	47	2	4.25532	1.06383
	46	0	0
	38	0	0
	35	0	0
Chi3l1-/-0w M3	46	0	0	0
	43	0	0
	48	0	0
Chi3l1-/-0w M4	45	0	0	0.990338
	59	0	0
	72	2	2.77778
	46	1	2.17391
	55	0	0
WT 8w M1	39	8	20.5128	28.1205
	49	16	32.6531
	45	14	31.1111
	39	11	28.2051
WT 8w M2	41	13	31.7073	33.0087
	42	13	30.9524
	40	11	27.5
	43	15	34.8837
	40	16	40
WT 8w M3	46	17	36.9565	35.8928
	41	17	41.4634
	44	13	29.5455
	33	12	36.3636
	37	13	35.1351
WT 8w M4	32	11	34.375	34.3494
	34	13	38.2353
	35	11	31.4286
	39	13	33.3333
	32	11	34.375
Chi3l1-/-8w M1	11	6	54.5455	41.2559
	29	10	34.4828
	33	11	33.3333
	27	12	44.4444
	38	15	39.4737
Chi3l1-/-8w M2	28	12	42.8571	42.3365
	23	10	43.4783
	39	17	43.5897
	29	13	44.8276
	33	14	42.4242
	38	14	36.8421
Chi3l1-/-8w M3	45	15	33.3333	38.6411
	47	16	34.0426
	42	17	40.4762
	44	18	40.9091
	36	16	44.4444
Chi3l1-/-8w M4	23	9	39.1304	39.2478
	32	13	40.625
	45	15	33.3333
	41	18	43.9024
WT 16w M1	34	19	55.8824	52.6632
	33	16	48.4848
	25	13	52
	35	19	54.2857
WT 16w M2	31	16	51.6129	57.0273
	22	12	54.5455
	31	18	58.0645
	32	19	59.375
	26	16	61.5385
WT 16w M3	33	19	57.5758	60.8565
	20	13	65
	19	12	63.1579
	26	15	57.6923
WT 16w M4	29	18	62.069	58.1229
	27	17	62.963
	29	15	51.7241
	35	19	54.2857
	35	22	62.8571
	31	17	54.8387
Chi3l1-/-16w M1	22	14	63.6364	63.9722
	29	21	72.4138
	26	17	65.3846
	26	15	57.6923
	20	12	60
	17	11	64.7059
Chi3l1-/-16w M2	13	8	61.5385	66.1567
	10	7	70
	17	12	70.5882
	8	5	62.5
Chi3l1-/-16w M3	16	11	68.75	63.9399
	22	14	63.6364
	28	17	60.7143
	19	12	63.1579
	21	14	66.6667
	28	17	60.7143
Chi3l1-/-16w M4	30	19	63.3333	64.4688
	28	17	60.7143
	13	9	69.2308
	40	25	62.5
	29	20	68.9655
	29	18	62.069
