# Supplementary material for: Differential regulation of hepatic macrophage fate by Chi3l1 in metabolic dysfunction-associated steatotic liver disease
Source: eLife. 2026 Jun 26;14:RP107023. doi: 10.7554/eLife.107023 (PMC13309125; doi:10.7554/eLife.107023)
Supplement: Figure 6—source data 1. [file elife-107023-fig6-data1.xlsx]

## Sheet: Figure 6E
Ligand concentration (M)	Fnorm(0/00)		Kd=4.95± 0.66mM
0.2	840.326		S/N=27.7
0.05	841.742
0.025	841.85
0.0125	847.511
0.00625	849.302
0.003125	851.91
0.0015625	854.987
0.00078125	857.029
0.000390625	858.192
0.000195313	859.709
9.76563e-05	859.756
4.88281e-05	860.449
2.44141e-05	860.583
1.2207e-05	860.692
