# Supplementary material for: Differential regulation of hepatic macrophage fate by Chi3l1 in metabolic dysfunction-associated steatotic liver disease
Source: eLife. 2026 Jun 26;14:RP107023. doi: 10.7554/eLife.107023 (PMC13309125; doi:10.7554/eLife.107023)
Supplement: Figure 7—source data 1. [file elife-107023-fig7-data1.xlsx]

## Sheet: Figure 7A
Area of 2-NBDG(%)					One-way analysis of variance (ANOVA)	P value	P value summary	Significantly different (P < 0.05)?
No 2-NBDG	No 2-NBDG+rChi3l1	2-NBDG	2-NBDG+rChi3l1		No 2-NBDG VS No 2-NBDG+rChi3l1	0.72	ns	No
0.002	0.002	0.019	0.018		No 2-NBDG VS 2-NBDG	<0.001	***	Yes
0.001	0.000922	0.011	0.021		No 2-NBDG VS 2-NBDG+rChi3l1	0.017	*	Yes
0.017	0.003	0.047	0.016		No 2-NBDG+rChi3l1 VS 2-NBDG	<0.001	***	Yes
0.014	0.006	0.012	0.006		No 2-NBDG+rChi3l1 VS 2-NBDG+rChi3l1	0.035	*	Yes
0.003	0.009	0.011	0.016		2-NBDG VS 2-NBDG+rChi3l1	0.029	*	Yes
0.002	0.002	0.004	0.007
0.002	0.01	0.005	0.013
0.008	0.006	0.008	0.011
0.004	0.021	0.016	0.009
0.006	0.007	0.031	0.016
0.000956	0.017	0.016	0.006
0.003	0.007	0.006	0.018
0.011	0.000878	0.014	0.014
0.011	0.011	0.042	0.017
0.003	0.005	0.049	0.012
0.004	0.002	0.026	0.01
0.006	0.002
0.01	0.02
	0.001
	0.007

## Sheet: Figure 7C
	High glucose				High glucose+rChi3l1
Time (minutes)	Sample 1	Sample 2	Sample 3	Sample 4	Sample 1	Sample 2	Sample 3	Sample 4
1.38166	27.8475	37.9261	34.828	33.5916	26.0589	26.0081	39.3805	26.2865
9.87527	27.7936	38.1556	34.5511	32.655	25.4087	25.61	39.951	27.2748
18.376	28.3799	38.0005	34.5336	32.8159	25.6451	26.0774	39.1441	27.7262
26.9884	82.6325	103.684	94.3167	75.1546	48.354	50.9685	71.0164	54.4359
35.4856	90.2797	113.243	102.405	80.3512	50.7273	53.6606	73.9986	58.5398
43.9849	88.4728	109.483	97.9229	76.7668	46.605	50.4248	70.6917	55.3344
52.5908	97.5924	122.789	104.693	79.0994	47.0407	48.2145	69.456	52.9679
61.0891	115.667	140.07	127.147	99.1373	61.9072	65.256	87.8828	68.9064
69.8039	117.309	144.794	131.508	104.253	66.1397	70.4832	93.6835	73.9703
78.3918	20.5167	26.4147	24.3389	22.9274	16.7167	18.6518	24.3113	17.9487
87.0801	18.3965	24.157	21.6365	20.0145	15.5145	16.9261	23.139	16.1583
95.577	18.8409	23.0836	21.2978	19.3205	13.8738	14.4717	22.8994	15.7411

## Sheet: Figure 7D
	High glucose				High glucose+rChi3l1						t` test	P value	P value summary	Significantly different (P < 0.05)?
	Sample 1	Sample 2	Sample 3	Sample 4	Sample 1	Sample 2	Sample 3	Sample 4		Basal glycolytic capacity	High glucose VS High glucose+rChi3l1	0.002	**	Yes
Basal glycolytic capacity	61.9	75.24	67.87	47.54	25.08	27.58	34.85	30.81		Total glycolytic capacity	High glucose VS High glucose+rChi3l1	0.001	**	Yes
Total glycolytic capacity	88.93	106.79	96.97	71.44	40.49	44.41	54.54	46.24

## Sheet: Figure 7F
PI+cells/total kupffer cells(%)					One-way analysis of variance (ANOVA)	P value	P value summary	Significantly different (P < 0.05)?
Blank	Iso	PA	PA+rChi3l1		Blank VS Iso	0.403	ns	No
5.10638	3.95257	21.3836	11.2108		Blank VS PA	<0.001	***	Yes
3.61446	3.94737	19.375	11.6279		Blank VS PA+rChi3l1	<0.001	***	Yes
4.54545	5.16432	19.8925	10.7143		Iso VS PA	<0.001	***	Yes
5.16129	4.61538	17.4157	12.8205		Iso VS PA+rChi3l1	<0.001	***	Yes
4.7619	5.85774	18.2796	10.4803		PA VS PA+rChi3l1	<0.001	***	Yes
2.15054	4.93274	18.8235	11.1969

## Sheet: Figure 7G
Glucose uptake(nM/g/min)				One-way analysis of variance (ANOVA)	P value	P value summary	Significantly different (P < 0.05)?
WT	Chi3l1-/-	Chi3l1-/-+rChi3l1		WT VS Chi3l1-/-	<0.001	***	Yes
29316.7	42967.6	40240		WT VS Chi3l1-/-+rChi3l1	0.003	**	Yes
27690	47567.6	33873.3		Chi3l1-/- VS Chi3l1-/-+rChi3l1	0.001	**	Yes
29893.3	43364.9	38446.7
28823.3	47097.3	32453.3

## Sheet: Figure 7H
2-NBDG+TIM4+cells/TIM4+cells(%)				One-way analysis of variance (ANOVA)	P value	P value summary	Significantly different (P < 0.05)?
WT	Chi3l1-/-	Chi3l1-/-+rChi3l1		WT VS Chi3l1-/-	<0.001	***	Yes
23.0769	55.5556	57.1429		WT VS Chi3l1-/-+rChi3l1	0.011	*	Yes
27.2727	50	25		Chi3l1-/- VS Chi3l1-/-+rChi3l1	0.003	**	Yes
36.3636	57.1429	71.4286
57.1429	77.7778	22.2222
33.3333	66.6667	44.4444
18.1818	75	40
36.3636	62.5	44.4444
54.5455	66.6667	50
27.2727	44.4444	27.2727
22.2222	50	42.8571
16.6667	50	33.3333
33.3333	77.7778	60
25	66.6667	71.4286
50	44.4444	50
37.5	66.6667	60
44.4444	40	50
54.5455	55.5556	25
25	55.5556	25
30		40
		50
		66.6667
